# Supplementary material for: Antibiotic Treatment and Adverse Events in Acute Rhinosinusitis: A Long- term Nationwide Population-Based Cohort Study in South Korea
Source: Research Square preprint supplement (doi:10.21203/rs.3.rs-7279221/v1), 2025-08-22

**Antibiotic Treatment and Adverse Events in Acute Rhinosinusitis: A Long-term Nationwide Population-Based Cohort Study in South Korea**

Jongyoon Kim1†, Nayoung Ha2†, Jeong Wook Kang3, Woojoo Lee2,4*, Bo-Hyung Kim5,6,7*

1Department of Medicine, Graduate School, Kyung Hee University, Seoul, Republic of Korea

2Department of Public Health Sciences, Graduate School of Public Health, Seoul National University, Seoul, Republic of Korea

3Department of Otorhinolaryngology-Head and Neck Surgery, Hallym University Sacred Heart Hospital, Hallym University College of Medicine, Anyang, Republic of Korea

4Institute of Health & Environment, Seoul National University, Seoul, Republic of Korea

5Department of Clinical Pharmacology and Therapeutics, Kyung Hee University College of Medicine, Kyung Hee University Hospital, Seoul, Republic of Korea

6Department of Biomedical Science and Technology, Graduate School, Kyung Hee University, Seoul, Republic of Korea

7East-West Medical Research Institute, Kyung Hee University, Seoul, Republic of Korea

**Corresponding author:**

Bo-Hyung Kim

26, Kyungheedae -Yo Dongdaemun-gu, Seoul 02447, Republic of Korea

Tel +82 10 3736 4398 ; Email [bhkim98@khu.ac.kr](mailto:bhkim98@khu.ac.kr)

Woojoo Lee

Department of Public Health Sciences, Graduate School of Public Health, Seoul National University, 1 Gwanak-ro, Gwanak-gu, Seoul 08826, Republic of Korea

Tel: +82-2-880-2899; Fax: +82-2-762-9105; E-mail: lwj221@snu.ac.kr

†Contributed equally.

Appendix A. Inverse probability of treatment weighting method

Appendix B. Cloning-censoring-weighting method

Supplementary Table 1. Number of exclusions for adverse events within 180 days before the index date

Supplementary Table 2. Protocol for target trial emulation to estimate the effects of the recommended antibiotic treatment

Supplementary Table 3. Protocol for target trial emulation to estimate the effects of treatment duration

Supplementary Table 4. Definitions and codes to define the baseline covariates

Supplementary Table 5. Codes to identify adverse drug event outcomes

Supplementary Table 6. Baseline characteristics of antibiotic classes

Supplementary Table 7. Comparative risk of adverse event by antibiotic class

Supplementary Figure 1. Covariate balance using absolute standardized mean differences before and after inverse probability of treatment weighting for each cohort

Supplementary Figure 2. Cloning-censoring-weighting by treatment group using stabilized IPCW

Supplementary Figure 3. Cloning-censoring-weighting by antibiotic class using stabilized IPCW

**Appendix A. Inverse probability of treatment weighting method**

To evaluate the effects of antibiotic treatment groups (or classes) on adverse events, the inverse probability of treatment weighting (IPTW) method is commonly used to adjust for potential confounding factors in observational studies. Let *Z* denote the binary treatment assignment, where *Z=*0 represents the first-line treatment group (reference) and *Z=*1 represents alternatives. Let *L* denote a vector of covariates observed at the baseline. The propensity score (𝑃𝑆) is estimated using the following logistic regression model:

| ) | (A.1) |
| --- | --- |

where = and is the intercept, is the coefficients of the baseline covariates. The weight for patient *i* is defined as

|  | (A.2) |
| --- | --- |

The IPTW method adjusts for potential confounding by creating a pseudo-population in which the distribution of baseline covariates is balanced between the treatment groups (or antibiotic classes). The weights are truncated at the 99th percentile of the distribution to eliminate extreme weights.

We performed the same procedure to compare the first-like treatment group (Z=0) with the other groups (Z=1).

**Appendix B. Cloning-censoring-weighting method**

To evaluate the effect of discontinuing the antibiotic treatment during specific time windows (e.g., within 7, 14, and 21 days), the cloning-censoring-weighting (CCW) method is implemented. We illustrate the examples for patients A, B, and C to explain the CCW method consisting of three steps.


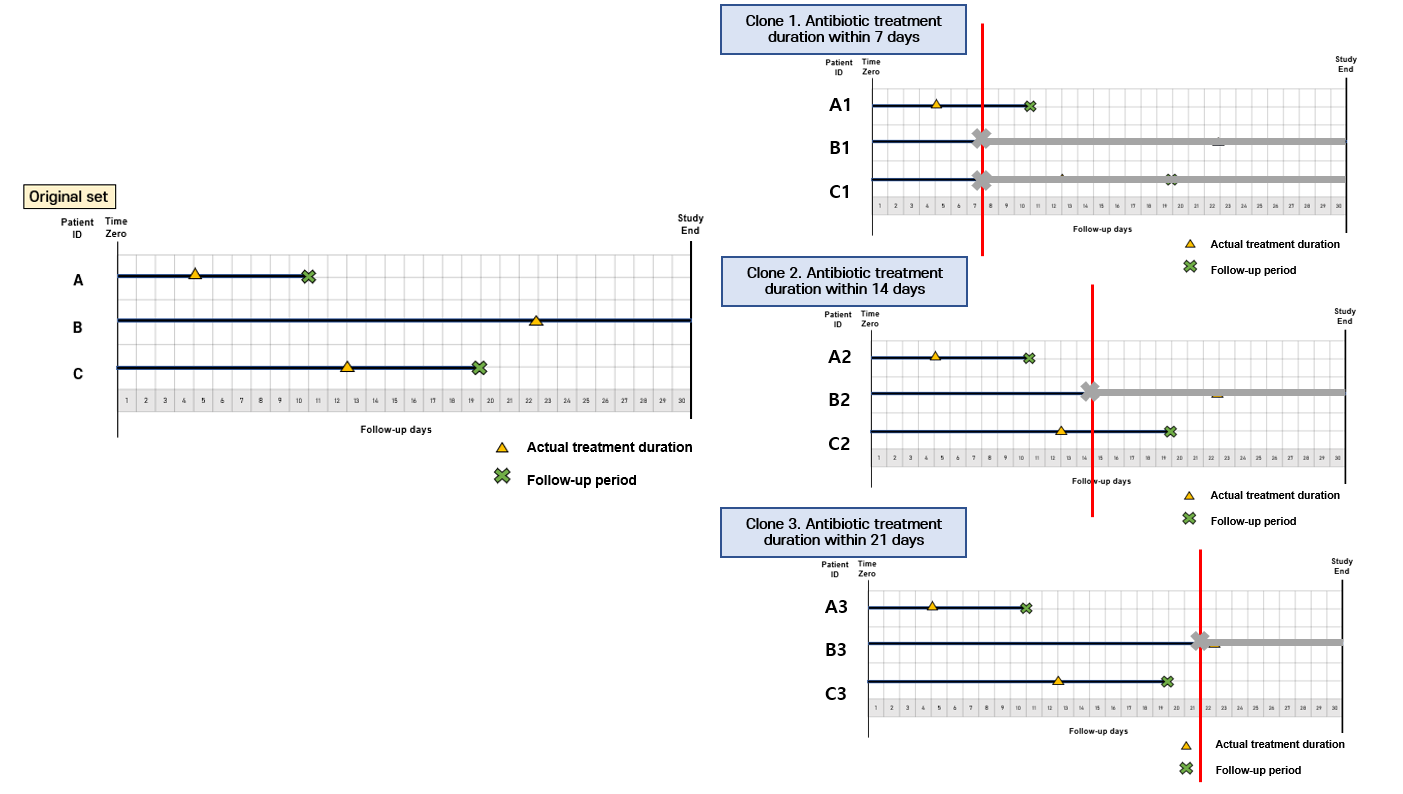


*Step1. Cloning*

Time zero was defined as the initiation of oral antibiotic prescription within 7 days after the diagnosis of acute rhinosinusitis. Each patient in the original dataset is duplicated into three clones (e.g., Clones 1, 2, and 3), and each clone is assigned to every treatment duration strategy at once (e.g., “Duration of treatment within 7 days,” “Duration of treatment within 14 days,” or “Duration of treatment within 21 days”). These three strategies always achieve a balance in baseline characteristics at time zero.

*Step 2. Censoring*

Clones are artificially censored when their actual treatment duration deviates from their assigned strategy.

1. Patient A discontinued the antibiotic treatment on day 4, and the event occurred on day 10.

   Clone A1 is assigned to the strategy “Duration of treatment within 7 days.” Because Patient A adheres to this treatment strategy, Clone A1 is not censored during the follow-up period.

Clone A2 is assigned to the strategy “Duration of treatment within 14 days.” Because Patient A also adheres to this treatment strategy, Clone A2 is not censored during the follow-up.

Clone A3 is assigned to the strategy “Duration of treatment within 21 days.” Because Patient A adheres to this treatment strategy, Clone A3 is not censored during the follow-up.

1. Patient B discontinued the treatment on day 22 and followed up until the end of the study period.

Clone B1 is assigned to the strategy “Duration of treatment within 7 days.” Because Patient B exceeds this strategy (i.e., 7 days), Clone B will be censored on day 7.

Clone B2 is assigned to the strategy “Duration of treatment within 14 days.” Because Patient B exceeds the duration of this strategy (i.e., 14 days), Clone B will be censored on day 14.

Clone B3 is assigned to the strategy “Duration of treatment within 21 days.” Because Patient B exceeds the duration of this strategy (i.e., 21 days), Clone B will be censored on day 21.

1. Patient C discontinued the treatment on day 12, and the event occurred on day 19.

Clone C1 is assigned to the strategy “Duration of treatment within 7 days.” Because Patient C exceeded the duration of this strategy (i.e., 7 days), Clone C will be censored on day 7.

Clone C2 is assigned to the strategy “Duration of treatment within 14 days.” Patient B adhered to this strategy and followed it until the outcome occurred on day 19.

Clone C3 is assigned to the strategy “Duration of treatment within 21 days.” Patient C adhered to this strategy, but the outcome occurred on day 19; we finished the follow-up on day 19.

*Step 3. Weighting*

To address the potential selection bias introduced by artificial censoring, we applied the inverse probability of **artificial censoring** weighting to the pooled logistic regression model. Time *t* was measured in days, with representing the baseline. Let and denote the indicator for the artificial censoring at time and, respectively*.* Let X denote the regimes of treatment duration strategy (e.g., “Duration of treatment within 7 days,” ‘‘Duration of treatment within 14 days,” or ‘‘Duration of treatment within 21 days”). Let be the indicator for the occurrence of an adverse event at time *t*,and denotes a vector of the observed baseline covariates. The probability of remaining uncensored at time *t* in the cloned datasetforeach treatment duration *x* was estimated using a pooled logistic regression model as follows:

|  | (B.1) |
| --- | --- |

where (*j*=1,…,10) are the coefficients of the baseline covariates, and represent the linear and quadratic time trend effects, respectively.

The inverse probability of artificial censoring weight (IPCW) for patient *i* at time *t* is calculated as

|  | (B.2) |
| --- | --- |

A stabilized IPCW was obtained by incorporating a numerator based on the average IPCW at each time point. The weights are truncated at the 99th percentile to eliminate the influence of extreme weights.

Finally, three cloned datasets were combined into a single dataset. To estimate the per-protocol effect of the treatment duration strategies on adverse events, an IPC-weighted pooled logistic model was implemented as follows:

|  | (B.3) |
| --- | --- |

Where is the intercept, represents the coefficient of treatment duration strategies such that quantifies the effect of treatment duration on the adverse event compared with the reference regime (“Duration of treatment within 7 days”), and present the linear and quadratic time trend effects, respectively.

Supplementary Table 1. Number of exclusions for adverse events within 180 days before the index date

|  | N (%) | | | | | | | | |
| --- | --- | --- | --- | --- | --- | --- | --- | --- | --- |
|  | **1st line therapy** | **Alternatives** | | | | **Others** | | | |
|  | **Penicillins** | **3rd cephalosporins** | **Quinolones** | **Tetracyclines** | **Lincosamides** | **2nd**  **cephalosporins** | **1st cephalosporins** | **Macrolides** | **Sulfonamides** |
| skin eruption | 783 | 84 | 39 | 3 | 3 | 369 | 22 | 241 | 6 |
| urticaria | 47,737 | 4,611 | 2,405 | 174 | 42 | 21,479 | 1,074 | 15,683 | 377 |
| erythema multiforme | 258 | 24 | 15 | 2 | 0 | 112 | 6 | 78 | 3 |
| anaphylactic reactions | 157 | 18 | 8 | 1 | 0 | 81 | 5 | 48 | 2 |
| angioedema | 30,402 | 3,266 | 1,844 | 93 | 18 | 15,402 | 929 | 9,466 | 289 |
| hypersensitivity, unclassified | 362 | 32 | 25 | 1 | 1 | 179 | 11 | 113 | 5 |
| abdominal pain | 10,301 | 869 | 511 | 33 | 5 | 4,782 | 258 | 2,789 | 103 |
| nausea and vomiting | 37,647 | 3,694 | 1,444 | 108 | 13 | 16,942 | 942 | 10,923 | 339 |
| diarrhea (non-C.*difficile*-related) | 34,697 | 2,515 | 1,464 | 84 | 14 | 14,450 | 1,051 | 8,819 | 307 |
| C. *difficile*-related diarrhea | 34 | 6 | 3 | 0 | 0 | 21 | 2 | 11 | 0 |
| vaginitis | 40,311 | 3,098 | 1,676 | 286 | 26 | 19,361 | 1,032 | 12,710 | 278 |
| aortic aneurysm and dissection | 205 | 26 | 15 | 1 | 0 | 107 | 3 | 62 | 2 |
| arrhythmia | 294 | 28 | 17 | 1 | 0 | 161 | 7 | 78 | 2 |
| acute renal failure | 397 | 46 | 20 | 2 | 1 | 231 | 14 | 106 | 6 |
| muscular and skeletal reaction | 27,314 | 2,332 | 1,253 | 88 | 17 | 12,419 | 764 | 8,143 | 259 |
| neuropathy | 6,109 | 806 | 432 | 22 | 2 | 2,967 | 229 | 1,772 | 76 |

Supplementary Table 2. Protocol for target trial emulation to estimate the effects of the recommended antibiotic treatment

| **Protocol Component** | **Target trial** | **Target Trial Emulation** |
| --- | --- | --- |
| **Research question** | To evaluate the effect of antibiotic treatment groups (or antibiotic classes) on adverse events | Same as target trial |
| **Eligibility criteria** | **Inclusion Criteria**  1.Age12 2. Diagnosis of acute rhinosinusitis and prescribed antibiotics between January 2011 and December 2019.  **Exclusion Criteria**  1.Diagnosis of acute rhinosinusitis within 1 year before the index date.  2.Antibiotic prescription (oral or injectable) within 30 days before the index date.  3. Hospitalization within 90 days prior to the index date  4. Diagnosis of chronic rhinosinusitis within 180 days before the index date.  5. Diagnosis of adverse events within 180 days before the index date. | Same as target trial.  Acute rhinosinusitis, chronic rhinosinusitis, adverse events and medical histories are identified through ICD-10 codes in NHIS database.  **Inclusion Criteria**  1.Age ≥12  2. Diagnosis of acute rhinosinusitis (J01 code as primary diagnosis) and prescribed antibiotics between January 2011 and December 2019.  **Exclusion Criteria**  1.Diagnosis of acute rhinosinusitis (J01 code as primary or first secondary diagnosis) within 1 year before the index date.  2.Antibiotic prescription (oral or injectable) within 30 days before the index date.  3. Hospitalization within 90 days prior to the index date  4. Diagnosis of chronic rhinosinusitis (J32 code as primary or first secondary diagnosis) within 180 days before the index date.  5. Diagnosis of adverse events within 180 days before the index date. |
| **Treatment strategies** | 1. First-line therapy 2. Alternatives or Others | Same as target trial,  Treatment groups are identified through antimicrobial agents code in NHIS database |
| **Treatment assignment** | Patients are randomly assigned to either strategy at baseline | Randomization is emulated through the cloning of individuals and assignment to every strategy |
| **Follow-up** | Follow-up started at the time of randomized treatment assignment and ended at the earliest occurrence of diagnosis of an adverse event, death, the cases of switching or simultaneous prescription to a different antibiotic group (oral or injectable) within the same episode, the occurrence of a subsequent episode, or reaching the administrative censoring date. | Same as target trial except time zero.  Time zero is defined as the initiation date of oral antibiotic prescription within 7 days after diagnosis of acute rhinosinusitis. |
| **Outcome** | 16 types of adverse events | 16 types of adverse events are identified through ICD-10 codes in NHIS database |
| **Causal contrasts of interest** | Intention-to-treat and per-protocol effect | Per-protocol effect only  (the effect of adhering to the treatment strategies during the follow-up.) |
| **Analysis plan** | Intention-to-treat analysis;  Per-protocol analysis: Patients are artificially censored when they deviate from the protocol. To estimate the per-protocol effect, inverse probability of censoring weight | Same as target trial.  We implemented inverse probability of treatment weighting to adjust for baseline covariates |

Supplementary Table 3. Protocol for target trial emulation to estimate the effects of treatment duration

| **Protocol Component** | **Target trial** | **Target Trial Emulation** |
| --- | --- | --- |
| **Research question** | To evaluate the effect of treatment strategies involving continuation of antibiotic treatment within 7, 14, and 21 days following the index date | Same as target trial. |
| **Eligibility criteria** | **Inclusion Criteria**  1.Age12 2. Diagnosis of acute rhinosinusitis and prescribed antibiotics between January 2011 and December 2019.  **Exclusion Criteria**  1.Diagnosis of acute rhinosinusitis within 1 year before the index date.  2.Antibiotic prescription (oral or injectable) within 30 days before the index date.  3. Hospitalization within 90 days prior to the index date  4. Diagnosis of chronic rhinosinusitis within 180 days before the index date.  5. Diagnosis of adverse events within 180 days before the index date. | Acute rhinosinusitis, chronic rhinosinusitis, adverse events and medical histories are identified through ICD-10 codes in NHIS database.  **Inclusion Criteria**  1. Age ≥12  2. Diagnosis of acute rhinosinusitis (J01 code as primary diagnosis) and prescribed antibiotics between January 2011 and December 2019.  **Exclusion Criteria**  1. Diagnosis of acute rhinosinusitis (J01 code as primary or first secondary diagnosis) within 1 year before the index date.  2. Antibiotic prescription (oral or injectable) within 30 days before the index date.  3. Hospitalization within 90 days prior to the index date  4. Diagnosis of chronic rhinosinusitis (J32 code as primary or first secondary diagnosis) within 180 days before the index date.  5. Diagnosis of adverse events within 180 days before the index date. |
| **Treatment strategies** | Three antibiotic treatment duration strategies within 7, 14, and 21-days | Same as target trial,  The duration of antibiotic treatment was calculated as the duration of the first treatment episode, defined as a single episode if the gap between consecutive prescriptions from the same antibiotic group was within 7 days |
| **Treatment assignment** | Patients are randomly assigned to either strategy at baseline | Randomization is emulated through the cloning of individuals and assignment to every strategy |
| **Follow-up** | Follow-up started at the time of randomized treatment assignment and ended at the earliest occurrence of diagnosis of an adverse event, death, the cases of switching or simultaneous prescription to a different antibiotic group (oral or injectable) within the same episode, the occurrence of a subsequent episode, or reaching the administrative censoring date. | Same as target trial except time zero.  Time zero is defined as the initiation date of oral antibiotic prescription within 7 days after diagnosis of acute rhinosinusitis. |
| **Outcome** | 16 types of adverse events | 16 types of adverse events are identified through ICD-10 codes in NHIS database (Supplementary Table S1) |
| **Causal contrasts of interest** | Intention-to-treat and per-protocol effect | Per-protocol effect only  (effect of adhering to the treatment strategies during the follow-up.) |
| **Analysis plan** | Intention-to-treat analysis;  Per-protocol analysis: Patients are artificially censored when they deviate from the protocol. To estimate the per-protocol effect, inverse probability of censoring weight | Per-protocol analysis: Expanded the dataset with 3 clones of each patient and assigned one clone to each treatment strategy. Clones are artificially censored when they deviate from their assigned protocol. |

Supplementary Table 4. Definitions and codes to define the baseline covariates

| **Baseline Covariates** | **Definitions** |
| --- | --- |
| **Residential area** | Seoul Capital Area [Seoul (11), Gyeonggi (41), Incheon (28)], Metropolitan Area [Non-Seoul Capital Area (26, 27, 29, 30, 31, 36)], and Rural [all other areas]), |
| **Household income** | Categorized into Insurance premium quantile levels “0-4","5-8","9-12","13-16","17-20” |
| **Average diurnal temperature range** | Average diurnal temperature range for the 7 days prior to the index antibiotic prescription |
| **History of other adverse events** | “1” if any adverse event occurred before the index date, “0” if not. |
| **Medical history** | **ICD-10 codes** |
| **Respiratory infection** | J00 - J06 Acute upper respiratory infections  J09 - J18 Influenza and pneumonia  J20 - J22 Other acute lower respiratory infections |
| **Respiratory disease** | J30 - J39 Other diseases of upper respiratory tract  J40 - J47 Chronic lower respiratory diseases |
| **Elixhauser Comorbidity Index** | **ICD-10 codes** |
| Congestive heart failure | I09.9, I11.0, I13.0, I13.2, I25.5, I42.0, I42.5 - I42.9, I43, I50, P29.0 |
| Cardiac arrhythmias | I44.1 - I44.3, I45.6, I45.9, I47 - I49, R00.0, R00.1, R00.8, T82.1, Z45.0, Z95.0 |
| Valvular disease | A52.0, I05 - I08, I09.1, I09.8, I34 - I39, Q23.0 - Q23.3, Z95.2 - Z95.4 |
| Pulmonary circulation disorders | I26, I27, I28.0, I28.8, I28.9 |
| Peripheral vascular disorders | I70, I71, I73.1, I73.8, I73.9, I77.1, I79.0, I79.2, K55.1, K55.8, K55.9, Z95.8, Z95.9 |
| Hypertension (uncomplicated) | I10 |
| Hypertension (complicated) | I11 - I13, I15 |
| Paralysis | G04.1, G11.4, G80.1, G80.2, G81, G82, G83.0 - G83.4, G83.9 |
| Other neurological disorders | G10 - G13, G20 - G22, G25.4, G25.5, G31.2, G31.8, G31.9, G32, G35 - G37, G40, G41, G93.1, G93.4, R47.0, R56 |
| Chronic pulmonary disease | I27.8, I27.9, J40 - J47, J60 - J67, J68.4, J70.1, J70.3 |
| Diabetes, uncomplicated | E10.0, E10.1, E10.9, E11.0, E11.1, E11.9, E12.0, E12.1, E12.9, E13.0, E13.1, E13.9, E14.0, E14.1, E14.9 |
| Diabetes, complicated | E10.2 - E10.8, E11.2 - E11.8, E12.2 - E12.8, E13.2 - E13.8, E14.2 - E14.8 |
| Hypothyroidism | E00 - E03, E89.0 |
| Renal failure | I12.0, I13.1, N18, N19, N25.0, Z49.0 - Z49.2, Z94.0, Z99.2 |
| Liver disease | B18, I85, I86.4, I98.2, K70, K71.1, K71.3 - K71.5, K71.7, K72 - K74, K76.0, K76.2 - K76.9, Z94.4 |
| Peptic ulcer disease, excluding bleeding | K25.7, K25.9, K26.7, K26.9, K27.7, K27.9, K28.7, K28.9 |
| AIDS/HIV | B20 - B22, B24 |
| Lymphoma | C81 - C85, C88, C96, C90.0, C90.2 |
| Metastatic cancer | C77 - C80 |
| Solid tumour without metastasis | C00 - C26, C30 - C34, C37 - C41, C43, C45 - C58, C60 - C76, C97 |
| Rheumatoid arthritis/collagen vascular diseases | L94.0, L94.1, L94.3, M05, M06, M08, M12.0, M12.3, M30, M31.0 - M31.3, M32 - M35, M45, M46.1, M46.8, M46. |
| Coagulopathy | D65 - D68, D69.1, D69.3 - D69.6 |
| Obesity | E66 |
| Weight loss | E40 - E46, R63.4, R64 |
| Fluid and electrolyte disorders | E22.2, E86, E87 |
| Blood loss anaemia | D50.0 |
| Deficiency anaemia | D50.8, D50.9, D51 - D53 |
| Alcohol abuse | F10, E52, G62.1, I42.6, K29.2, K70.0, K70.3, K70.9, T51, Z50.2, Z71.4, Z72.1 |
| Drug abuse | F11 - F16, F18, F19, Z71.5, Z72.2 |
| Psychoses | F20, F22 - F25, F28, F29, F30.2, F31.2, F31.5 |
| Depression | F20.4, F31.3 - F31.5, F32, F33, F34.1, F41.2, F43.2 |

Supplementary Table 5. Codes to identify adverse drug event outcomes

| **Organ class** | **Adverse Drug Event Outcome** | **Follow-up (days)** | **ICD-10 diagnosis codes** |
| --- | --- | --- | --- |
| Dermatologic reactions | skin eruption | 30 | L27.0, L27.1, R21 |
| urticaria | 30 | L50.0, L50.1, L50.6, L50.8, L50.9, L56.0, L56.1, L56.2, L56.3, L56.4, L56.8, L56.9 |
| erythema multiforme | 60 | L51.0, L51.1, L51.2, L51.3, L51.8, L51.9 |
| Hypersensitivities | anaphylactic reactions | 2 | T78.2, T88.6 |
| angioedema | 2 | R60.0, R60.1, R60.9, H02.84, J38.4, I73, T78.3 |
| hypersensitivity, unclassified | 2 | T78 |
| Gastrointestinal reactions | abdominal pain | 14 | R10.0 |
| nausea and vomiting | 14 | R11 |
| diarrhea (non-C.*difficile*-related) | 60 | K59.1, K52.3, K52.89, K52.9, K52.29, K52.89, R19.7 |
| C. *difficile*-related diarrhea | 90 | A04.7 |
| Genitourinary reactions | vaginitis | 30 | N76.0, N76.1, N76.2, N77.1, B37.3 |
| Cardiovascular reactions | aortic aneurysm and dissection | 90 | I71 |
| arrhythmia | 90 | I49.8, I45.81 |
| Renal failure | acute renal failure | 21 | N17.0, N17.1, N17.2, N17.8, N17.9 |
| Neuromuscular and skeletal reactions | muscular and skeletal reaction | 90 | G11.1, M65.0, M65.2, M65.3, M65.8, M66.2, M66.3, M66.8, M66.9, M67.0, M67.1, M67.4, M67.8, M67.9, M68.8, M70.6, M75.12, M75.2, M75.3, M75.8, M76.0, M76.5, M76.6, M76.7, M76.81, M76.82, M77.9, S09.1, S16, S29.0, S39.0, S46.0, S46.1, S46.2, S46.3, S76.0, S76.1, S76.2, S86.0, T09.5, T14.6, T94.1 |
| neuropathy | 90 | G62.0, G62.1, G62.2, G62.8, G62.9, G61.0, G61.1, G61.8, G61.9, G63.0, G63.1, G63.2, G63.3, G63.4, G63.5, G63.6, G63.8, M14.6, M49.0, M49.1, M49.2, M49.3, M49.4, M49.5, M49.8, G58.0, G58.7, G58.8, G58.9 |

SupplementaryTable 6. Baseline characteristics for antibiotic classes

|  |  | N (%) | | | | | | | | | P-values |
| --- | --- | --- | --- | --- | --- | --- | --- | --- | --- | --- | --- |
|  | Treatment groups | **1st line therapy** | **Alternatives** | | | | **Others** | | | |
|  | Antibiotic classes | **Penicillins** | **3rd cephalosporins** | **Quinolones** | **Tetracyclines** | **Lincosamides** | **2nd**  **cephalosporins** | **1st cephalosporins** | **Macrolides** | **Sulfonamides** |
| N |  | 664,157 | 48,010 | 23,910 | 1,658 | 302 | 287,077 | 16,951 | 189,392 | 5,413 |  |
| Sex (%) | Men | 308,827 (46.5) | 20,186 (42.0) | 10,181 (42.6) | 705 (42.5) | 141 (46.7) | 122,493 (42.7) | 7,450 (44.0) | 82,559 (43.6) | 2,462 (45.5) | <0.001 |
|  | Women | 355,330 (53.5) | 27,824 (58.0) | 13,729 (57.4) | 953 (57.5) | 161 (53.3) | 164,584 (57.3) | 9,501 (56.0) | 106,833 (56.4) | 2,951 (54.5) |  |
| Age at the first prescription (mean (SD)) | | 38.88 (16.70) | 43.02 (17.90) | 46.96 (16.02) | 41.81 (16.94) | 46.00 (17.36) | 40.03 (17.13) | 42.01 (18.32) | 39.45 (16.12) | 40.84 (19.12) | <0.001 |
| Region (%) | Seoul Capital Area | 361,180 (54.4) | 22,769 (47.4) | 12,465 (52.1) | 927 (55.9) | 169 (56.0) | 150,399 (52.4) | 8,045 (47.5) | 106,129 (56.0) | 2,195 (40.6) | <0.001 |
|  | Metropolitan Area | 121,274 (18.3) | 8,933 (18.6) | 3,706 (15.5) | 286 (17.2) | 75 (24.8) | 60,966 (21.2) | 4,405 (26.0) | 30,851 (16.3) | 1,895 (35.0) |  |
|  | Rural | 181,703 (27.4) | 16,308 (34.0) | 7,739 (32.4) | 445 (26.8) | 58 (19.2) | 75,712 (26.4) | 4,501 (26.6) | 52,412 (27.7) | 1,323 (24.4) |  |
| Income level (%) | "0-4" | 112,506 (16.9) | 8,196 (17.1) | 4,158 (17.4) | 302 (18.2) | 48 (15.9) | 49,414 (17.2) | 2,874 (17.0) | 30,700 (16.2) | 960 (17.7) | <0.001 |
|  | "5-8" | 98,858 (14.9) | 6,963 (14.5) | 3,519 (14.7) | 222 (13.4) | 51 (16.9) | 42,800 (14.9) | 2,461 (14.5) | 27,560 (14.6) | 754 (13.9) |  |
|  | "9-12" | 122,627 (18.5) | 8,820 (18.4) | 4,257 (17.8) | 293 (17.7) | 48 (15.9) | 52,047 (18.1) | 2,961 (17.5) | 33,770 (17.8) | 902 (16.7) |  |
|  | "13-16" | 149,415 (22.5) | 10,835 (22.6) | 5,310 (22.2) | 330 (19.9) | 58 (19.2) | 62,555 (21.8) | 3,790 (22.4) | 42,112 (22.2) | 1,220 (22.5) |  |
|  | "17-20" | 180,751 (27.2) | 13,196 (27.5) | 6,666 (27.9) | 511 (30.8) | 97 (32.1) | 80,261 (28.0) | 4,865 (28.7) | 55,250 (29.2) | 1,577 (29.1) |  |
| Insurance type (%) | 1.Local_subscriber | 76,628 (11.5) | 5,906 (12.3) | 3,524 (14.7) | 240 (14.5) | 44 (14.6) | 33,028 (11.5) | 2,036 (12.0) | 20,805 (11.0) | 651 (12.0) | <0.001 |
|  | 2.Local_subscriber_dep | 105,888 (15.9) | 7,188 (15.0) | 3,366 (14.1) | 263 (15.9) | 34 (11.3) | 44,641 (15.6) | 2,788 (16.4) | 27,252 (14.4) | 880 (16.3) |  |
|  | 5.Employee | 227,962 (34.3) | 16,253 (33.9) | 8,680 (36.3) | 564 (34.0) | 126 (41.7) | 99,310 (34.6) | 5,299 (31.3) | 72,449 (38.3) | 1,556 (28.7) |  |
|  | 6.Employee_dep | 237,763 (35.8) | 17,211 (35.8) | 7,535 (31.5) | 548 (33.1) | 92 (30.5) | 102,136 (35.6) | 6,401 (37.8) | 64,619 (34.1) | 2197 (40.6) |  |
|  | 7.Medical_benefit | 8,925 ( 1.3) | 1,025 ( 2.1) | 620 ( 2.6) | 20 ( 1.2) | 3 ( 1.0) | 4,620 ( 1.6) | 250 ( 1.5) | 2,534 ( 1.3) | 76 ( 1.4) |  |
|  | 8.Medical_benefit_dep | 6,991 ( 1.1) | 427 ( 0.9) | 185 ( 0.8) | 23 ( 1.4) | 3 ( 1.0) | 3,342 ( 1.2) | 177 ( 1.0) | 1,733 ( 0.9) | 53 ( 1.0) |  |
| ECI (mean (SD)) | | 0.66 (1.18) | 0.97 (1.49) | 1.05 (1.51) | 0.83 (1.26) | 0.92 (1.38) | 0.72 (1.25) | 0.78 (1.30) | 0.67 (1.19) | 0.80 (1.35) | <0.001 |
| History of  Respiratory infections(%) | 0 | 277,481 (41.8) | 18,257 (38.0) | 8,430 (35.3) | 549 (33.1) | 119 (39.4) | 121,780 (42.4) | 6,767 (39.9) | 77,686 (41.0) | 1,984 (36.7) | <0.001 |
|  | 1 | 386,676 (58.2) | 29,753 (62.0) | 15,480 (64.7) | 1,109 (66.9) | 183 (60.6) | 165,297 (57.6) | 10,184 (60.1) | 111,706 (59.0) | 3,429 (63.3) |  |
| History of  respiratory  diseases (%) | 0 | 349,893 (52.7) | 22,245 (46.3) | 10,794 (45.1) | 714 (43.1) | 130 (43.0) | 150,007 (52.3) | 9,061 (53.5) | 94,032 (49.6) | 2,673 (49.4) | <0.001 |
|  | 1 | 314,264 (47.3) | 25,765 (53.7) | 13,116 (54.9) | 944 (56.9) | 172 (57.0) | 137,070 (47.7) | 7,890 (46.5) | 95,360 (50.4) | 2,740 (50.6) |  |
| Average temperature range (mean (SD)) |  | 10.14 (2.48) | 10.15 (2.55) | 9.91 (2.50) | 9.97 (2.41) | 10.10 (2.52) | 10.00 (2.46) | 9.93 (2.43) | 10.12 (2.52) | 10.22 (2.37) | <0.001 |
| History of other  adverse events (%) | 0 | 471,586 (71.0) | 30,807 (64.2) | 14,628 (61.2) | 968 (58.4) | 187 (61.9) | 200,067 (69.7) | 11,921 (70.3) | 131,770 (69.6) | 3,792 (70.1) | <0.001 |
|  | 1 | 192,571 (29.0) | 17,203 (35.8) | 9,282 (38.8) | 690 (41.6) | 115 (38.1) | 87,010 (30.3) | 5,030 (29.7) | 57,622 (30.4) | 1,621 (29.9) |  |
| Year of  prescription (%) | 2011 | 110,664 (16.7) | 4,637 ( 9.7) | 4,973 (20.8) | 212 (12.8) | 31 (10.3) | 40,782 (14.2) | 4,082 (24.1) | 20,269 (10.7) | 843 (15.6) | <0.001 |
|  | 2012 | 91,451 (13.8) | 4,801 (10.0) | 5,461 (22.8) | 193 (11.6) | 30 (9.9) | 36,437 (12.7) | 2,873 (16.9) | 21,831 (11.5) | 950 (17.6) |  |
|  | 2013 | 78,682 (11.8) | 4,905 (10.2) | 4,381 (18.3) | 187 (11.3) | 32 (10.6) | 34,523 (12.0) | 2,104 (12.4) | 20,963 (11.1) | 723 (13.4) |  |
|  | 2014 | 78,239 (11.8) | 5,640 (11.7) | 2,882 (12.1) | 188 (11.3) | 28 (9.3) | 34,785 (12.1) | 1,792 (10.6) | 21,756 (11.5) | 567 (10.5) |  |
|  | 2015 | 70,423 (10.6) | 5,925 (12.3) | 1,501 (6.3) | 198 (11.9) | 49 (16.2) | 31,587 (11.0) | 1,434 (8.5) | 21,321 (11.3) | 563 (10.4) |  |
|  | 2016 | 68,349 (10.3) | 5,504 (11.5) | 1,227 (5.1) | 191 (11.5) | 33 (10.9) | 31,607 (11.0) | 1,432 (8.4) | 23,106 (12.2) | 562 (10.4) |  |
|  | 2017 | 63,060 (9.5) | 5,402 (11.3) | 1,168 (4.9) | 176 (10.6) | 26 (8.6) | 28,279 (9.9) | 1,326 (7.8) | 21,946 (11.6) | 440 (8.1) |  |
|  | 2018 | 53,955 (8.1) | 5,614 (11.7) | 1,202 (5.0) | 154 (9.3) | 32 (10.6) | 26,061 (9.1) | 1,042 (6.1) | 19,450 (10.3) | 409 (7.6) |  |
|  | 2019 | 49,334 (7.4) | 5,582 (11.6) | 1,115 (4.7) | 159 (9.6) | 41 (13.6) | 23,016 (8.0) | 866 (5.1) | 18,750 (9.9) | 356 (6.6) |  |
| Month of  prescription (%) | January | 76,525 (11.5) | 5,316 (11.1) | 3,166 (13.2) | 177 (10.7) | 29 (9.6) | 32,710 (11.4) | 2,022 (11.9) | 20,436 (10.8) | 619 (11.4) | <0.001 |
|  | February | 64,430 (9.7) | 4,652 (9.7) | 2,702 (11.3) | 156 (9.4) | 28 (9.3) | 27,811 (9.7) | 1,764 (10.4) | 17,175 (9.1) | 540 (10.0) |  |
|  | March | 70,332 (10.6) | 4,839 (10.1) | 2,574 (10.8) | 156 (9.4) | 35 (11.6) | 29,954 (10.4) | 1,964 (11.6) | 18,906 (10.0) | 564 (10.4) |  |
|  | April | 73,377 (11.0) | 4,967 (10.3) | 2,430 (10.2) | 161 (9.7) | 32 (10.6) | 30,278 (10.5) | 1,814 (10.7) | 20,412 (10.8) | 608 (11.2) |  |
|  | May | 59,883 (9.0) | 4,505 (9.4) | 2,187 (9.1) | 145 (8.7) | 22 (7.3) | 24,771 (8.6) | 1,475 (8.7) | 16,870 (8.9) | 544 (10.0) |  |
|  | June | 37,740 (5.7) | 3,140 (6.5) | 1,411 (5.9) | 94 (5.7) | 20 (6.6) | 15,410 (5.4) | 873 (5.2) | 10,987 (5.8) | 292 (5.4) |  |
|  | July | 26,529 (4.0) | 2,300 (4.8) | 996 (4.2) | 91 (5.5) | 16 (5.3) | 11,901 (4.1) | 606 (3.6) | 7,993 (4.2) | 202 (3.7) |  |
|  | August | 26,155 (3.9) | 2,283 (4.8) | 920 (3.8) | 84 (5.1) | 17 (5.6) | 11,685 (4.1) | 587 (3.5) | 7,986 (4.2) | 217 (4.0) |  |
|  | September | 43,225 (6.5) | 3,192 (6.6) | 1,382 (5.8) | 101 (6.1) | 22 (7.3) | 19,732 (6.9) | 1,149 (6.8) | 12,710 (6.7) | 307 (5.7) |  |
|  | October | 52,632 (7.9) | 3,638 (7.6) | 1,795 (7.5) | 159 (9.6) | 29 (9.6) | 23,800 (8.3) | 1,409 (8.3) | 15,794 (8.3) | 419 (7.7) |  |
|  | November | 62,279 (9.4) | 4,144 (8.6) | 2,016 (8.4) | 169 (10.2) | 21 (7.0) | 27,338 (9.5) | 1,541 (9.1) | 18,695 (9.9) | 529 (9.8) |  |
|  | December | 71,050 (10.7) | 5,034 (10.5) | 2,331 (9.7) | 165 (10.0) | 31 (10.3) | 31,687 (11.0) | 1,747 (10.3) | 21,428 (11.3) | 572 (10.6) |  |
| Treatment duration  (mean (SD)) | | 4.79 (3.90) | 6.05 (5.44) | 5.76 (5.25) | 6.32 (7.65) | 6.18 (6.52) | 4.73 (4.02) | 4.47 (3.85) | 4.92 (3.69) | 4.98 (4.11) | <0.001 |

Supplementary Table 7. Comparative risk of adverse events by antibiotic class

| Adverse event | follow-up days | Treatment | Total | Events | Person-days | Rate | Crude HR | Crude  95% LR | Crude 95% UR | Weighted  HR | Weighted 95% LR | Weighted  95% UR |
| --- | --- | --- | --- | --- | --- | --- | --- | --- | --- | --- | --- | --- |
| 1. Skin Eruption | 30 | Penicillins | 663,374 | 165 | 17,598,535 | 0.09 | 1 [ref] | [ref] | [ref] | 1 [ref] | [ref] | [ref] |
|  | 30 | 3rd_cephalosporins | 47,926 | 22 | 1,246,523 | 0.18 | 1.47 | 0.74 | 2.93 | 1.14 | 0.52 | 2.46 |
|  | 30 | Quinolones | 23,871 | 6 | 638,147 | 0.09 | 1.28 | 0.47 | 3.48 | 1.11 | 0.37 | 3.31 |
|  | 30 | Tetracyclines | 1,655 | 1 | 43,726 | 0.23 | NA | NA | NA | NA | NA | NA |
|  | 30 | Lincosamides | 299 | 0 | 7,540 | 0 | NA | NA | NA | NA | NA | NA |
|  | 30 | 2nd_cephalosporins | 286,708 | 55 | 7,610,131 | 0.07 | 0.57 | 0.35 | 0.91 | 0.57 | 0.35 | 0.92 |
|  | 30 | 1st_cephalosporins | 16,929 | 3 | 452,113 | 0.07 | 1.36 | 0.43 | 4.29 | 1.3 | 0.41 | 4.13 |
|  | 30 | Macrolides | 189,151 | 54 | 5,041,378 | 0.11 | 1.14 | 0.74 | 1.74 | 1.11 | 0.72 | 1.72 |
|  | 30 | Sulfonamides | 5,407 | 5 | 145,626 | 0.34 | 4.18 | 1.32 | 13.21 | 5.11 | 1.58 | 16.51 |
| 2. Urticaria | 30 | Penicillins | 616,420 | 6,526 | 16,301,495 | 4 | 1 [ref] | [ref] | [ref] | 1 [ref] | [ref] | [ref] |
|  | 30 | 3rd_cephalosporins | 43,399 | 538 | 1,125,486 | 4.78 | 1.23 | 1.09 | 1.39 | 1.14 | 1 | 1.3 |
|  | 30 | Quinolones | 21,505 | 245 | 572,784 | 4.28 | 1.15 | 0.96 | 1.37 | 1.19 | 0.97 | 1.45 |
|  | 30 | Tetracyclines | 1,484 | 23 | 38,956 | 5.9 | 1.58 | 0.9 | 2.79 | 1.93 | 1 | 3.74 |
|  | 30 | Lincosamides | 260 | 3 | 6,457 | 4.65 | 2.08 | 0.67 | 6.44 | 2.47 | 0.59 | 10.27 |
|  | 30 | 2nd_cephalosporins | 265,598 | 2,938 | 7,023,369 | 4.18 | 1.06 | 1 | 1.13 | 1.04 | 0.98 | 1.11 |
|  | 30 | 1st_cephalosporins | 15,877 | 147 | 422,224 | 3.48 | 0.87 | 0.69 | 1.1 | 0.86 | 0.67 | 1.1 |
|  | 30 | Macrolides | 173,709 | 1,966 | 4,615,133 | 4.26 | 1.07 | 1 | 1.15 | 1.03 | 0.96 | 1.1 |
|  | 30 | Sulfonamides | 5,036 | 54 | 134,890 | 4 | 0.6 | 0.37 | 0.98 | 0.58 | 0.34 | 1 |
| 3. Erythema multiforme | 60 | Penicillins | 663,899 | 76 | 32,567,756 | 0.02 | 1 [ref] | [ref] | [ref] | 1 [ref] | [ref] | [ref] |
|  | 60 | 3rd_cephalosporins | 47,986 | 3 | 2,291,347 | 0.01 | 0.81 | 0.2 | 3.37 | 0.58 | 0.14 | 2.5 |
|  | 60 | Quinolones | 23,895 | 3 | 1,177,643 | 0.03 | 1.57 | 0.38 | 6.54 | 1.58 | 0.38 | 6.61 |
|  | 60 | Tetracyclines | 1,656 | 0 | 80,232 | 0 | NA | NA | NA | NA | NA | NA |
|  | 60 | Lincosamides | 302 | 0 | 13,881 | 0 | NA | NA | NA | NA | NA | NA |
|  | 60 | 2nd_cephalosporins | 286,965 | 29 | 14,046,090 | 0.02 | 0.86 | 0.46 | 1.63 | 0.87 | 0.46 | 1.65 |
|  | 60 | 1st_cephalosporins | 16,945 | 2 | 838,244 | 0.02 | 2.23 | 0.54 | 9.26 | 2.63 | 0.61 | 11.23 |
|  | 60 | Macrolides | 189,314 | 18 | 9,312,414 | 0.02 | 0.8 | 0.37 | 1.72 | 0.89 | 0.4 | 1.96 |
|  | 60 | Sulfonamides | 5,410 | 0 | 269,793 | 0 | NA | NA | NA | NA | NA | NA |
| 4. Anaphylactic reactions | 2 | Penicillins | 664,000 | 1 | 1,323,406 | 0.01 | 1 [ref] | [ref] | [ref] | 1 [ref] | [ref] | [ref] |
|  | 2 | 3rd_cephalosporins | 47,992 | 0 | 95,367 | 0 | NA | NA | NA | NA | NA | NA |
|  | 2 | Quinolones | 23,902 | 0 | 47,587 | 0 | NA | NA | NA | NA | NA | NA |
|  | 2 | Tetracyclines | 1,657 | 0 | 3,298 | 0 | NA | NA | NA | NA | NA | NA |
|  | 2 | Lincosamides | 302 | 0 | 602 | 0 | NA | NA | NA | NA | NA | NA |
|  | 2 | 2nd_cephalosporins | 286,996 | 0 | 571,761 | 0 | NA | NA | NA | NA | NA | NA |
|  | 2 | 1st_cephalosporins | 16,946 | 0 | 33,758 | 0 | NA | NA | NA | NA | NA | NA |
|  | 2 | Macrolides | 189,344 | 0 | 377,614 | 0 | NA | NA | NA | NA | NA | NA |
|  | 2 | Sulfonamides | 5,411 | 0 | 10,785 | 0 | NA | NA | NA | NA | NA | NA |
| 5. Angioedema | 2 | Penicillins | 633,755 | 421 | 1,263,083 | 3.33 | 1 [ref] | [ref] | [ref] | 1 [ref] | [ref] | [ref] |
|  | 2 | 3rd_cephalosporins | 44,744 | 43 | 88,903 | 4.84 | 1.36 | 0.87 | 2.13 | 1.24 | 0.76 | 2.03 |
|  | 2 | Quinolones | 22,066 | 17 | 43,929 | 3.87 | 1.48 | 0.81 | 2.72 | 1.69 | 0.81 | 3.53 |
|  | 2 | Tetracyclines | 1,565 | 0 | 3,115 | 0 | NA | NA | NA | NA | NA | NA |
|  | 2 | Lincosamides | 284 | 0 | 566 | 0 | NA | NA | NA | NA | NA | NA |
|  | 2 | 2nd_cephalosporins | 271,675 | 219 | 541,178 | 4.05 | 1.28 | 1.03 | 1.6 | 1.22 | 0.98 | 1.53 |
|  | 2 | 1st_cephalosporins | 16,022 | 3 | 31,917 | 0.94 | 0.36 | 0.09 | 1.44 | 0.45 | 0.11 | 1.92 |
|  | 2 | Macrolides | 179,926 | 120 | 358,827 | 3.34 | 0.97 | 0.73 | 1.29 | 0.95 | 0.71 | 1.27 |
|  | 2 | Sulfonamides | 5,124 | 3 | 10,211 | 2.94 | 1.13 | 0.28 | 4.55 | 0.87 | 0.12 | 6.17 |
|  | 2 | Penicillins | 663,795 | 3 | 1,322,998 | 0.02 | 1 [ref] | [ref] | [ref] | 1 [ref] | [ref] | [ref] |
| 6. Hypersensitivity | 2 | 3rd_cephalosporins | 47,978 | 0 | 95,338 | 0 | NA | NA | NA | NA | NA | NA |
|  | 2 | Quinolones | 23,885 | 0 | 47,553 | 0 | NA | NA | NA | NA | NA | NA |
|  | 2 | Tetracyclines | 1,657 | 0 | 3,298 | 0 | NA | NA | NA | NA | NA | NA |
|  | 2 | Lincosamides | 301 | 0 | 600 | 0 | NA | NA | NA | NA | NA | NA |
|  | 2 | 2nd_cephalosporins | 286,898 | 0 | 571,562 | 0 | NA | NA | NA | NA | NA | NA |
|  | 2 | 1st_cephalosporins | 16,940 | 0 | 33,745 | 0 | NA | NA | NA | NA | NA | NA |
|  | 2 | Macrolides | 189,279 | 1 | 377,484 | 0.03 | 1.75 | 0.16 | 19.33 | 1.38 | 0.12 | 15.17 |
|  | 2 | Sulfonamides | 5,408 | 0 | 10,779 | 0 | NA | NA | NA | NA | NA | NA |
| 7. Abdominal pain | 14 | Penicillins | 653,856 | 854 | 8,546,493 | 1 | 1 [ref] | [ref] | [ref] | 1 [ref] | [ref] | [ref] |
|  | 14 | 3rd_cephalosporins | 47,141 | 67 | 607,952 | 1.1 | 0.83 | 0.56 | 1.23 | 0.78 | 0.51 | 1.22 |
|  | 14 | Quinolones | 23,399 | 33 | 307,376 | 1.07 | 1.2 | 0.76 | 1.91 | 1.13 | 0.66 | 1.95 |
|  | 14 | Tetracyclines | 1,625 | 2 | 21,220 | 0.94 | NA | NA | NA | NA | NA | NA |
|  | 14 | Lincosamides | 297 | 0 | 3,761 | 0 | NA | NA | NA | NA | NA | NA |
|  | 14 | 2nd_cephalosporins | 282,295 | 369 | 3,688,114 | 1 | 0.89 | 0.75 | 1.06 | 0.88 | 0.73 | 1.05 |
|  | 14 | 1st_cephalosporins | 16,693 | 23 | 218,608 | 1.05 | 1.07 | 0.6 | 1.9 | 0.97 | 0.52 | 1.83 |
|  | 14 | Macrolides | 186,603 | 222 | 2,450,234 | 0.91 | 0.86 | 0.7 | 1.06 | 0.86 | 0.69 | 1.06 |
|  | 14 | Sulfonamides | 5,310 | 7 | 70,182 | 1 | 1.11 | 0.42 | 2.97 | 0.94 | 0.31 | 2.84 |
| 8. Nausea and Vomiting | 14 | Penicillins | 626,510 | 3,437 | 8,179,691 | 4.2 | 1 [ref] | [ref] | [ref] | 1 [ref] | [ref] | [ref] |
|  | 14 | 3rd_cephalosporins | 44,316 | 306 | 570,809 | 5.36 | 1.31 | 1.12 | 1.54 | 1.15 | 0.97 | 1.37 |
|  | 14 | Quinolones | 22,466 | 132 | 294,527 | 4.48 | 1.02 | 0.79 | 1.31 | 0.95 | 0.71 | 1.27 |
|  | 14 | Tetracyclines | 1,550 | 12 | 20,191 | 5.94 | 1.62 | 0.77 | 3.4 | 1.71 | 0.7 | 4.18 |
|  | 14 | Lincosamides | 289 | 0 | 3,654 | 0 | NA | NA | NA | NA | NA | NA |
|  | 14 | 2nd_cephalosporins | 270,135 | 1,465 | 3,525,151 | 4.16 | 0.94 | 0.86 | 1.03 | 0.91 | 0.83 | 0.99 |
|  | 14 | 1st_cephalosporins | 16,009 | 80 | 209,484 | 3.82 | 0.82 | 0.59 | 1.13 | 0.92 | 0.65 | 1.3 |
|  | 14 | Macrolides | 178,469 | 943 | 2,340,433 | 4.03 | 0.9 | 0.81 | 1 | 0.84 | 0.76 | 0.94 |
|  | 14 | Sulfonamides | 5,074 | 42 | 66,812 | 6.29 | 1.85 | 1.27 | 2.71 | 1.81 | 1.18 | 2.77 |
| 9. Diarrhea (Non-*C. difficile*-related) | 60 | Penicillins | 629,460 | 8,210 | 30,714,285 | 2.67 | 1 [ref] | [ref] | [ref] | 1 [ref] | [ref] | [ref] |
|  | 60 | 3rd_cephalosporins | 45,495 | 527 | 2,162,612 | 2.44 | 0.94 | 0.83 | 1.06 | 0.9 | 0.79 | 1.03 |
|  | 60 | Quinolones | 22,446 | 278 | 1,101,458 | 2.52 | 0.93 | 0.78 | 1.1 | 0.83 | 0.68 | 1.01 |
|  | 60 | Tetracyclines | 1,574 | 19 | 75,507 | 2.52 | 0.93 | 0.48 | 1.79 | 0.99 | 0.41 | 2.43 |
|  | 60 | Lincosamides | 288 | 3 | 13,020 | 2.3 | 0.58 | 0.08 | 4.1 | 0.89 | 0.13 | 6.3 |
|  | 60 | 2nd_cephalosporins | 272,627 | 3,372 | 13,280,197 | 2.54 | 0.94 | 0.88 | 0.99 | 0.93 | 0.88 | 0.98 |
|  | 60 | 1st_cephalosporins | 15,900 | 248 | 782,301 | 3.17 | 1.18 | 0.99 | 1.41 | 1.14 | 0.94 | 1.39 |
|  | 60 | Macrolides | 180,573 | 2,027 | 8,842,098 | 2.29 | 0.82 | 0.77 | 0.88 | 0.83 | 0.77 | 0.89 |
|  | 60 | Sulfonamides | 5,106 | 60 | 253,382 | 2.37 | 0.65 | 0.43 | 0.99 | 0.66 | 0.41 | 1.07 |
| 10. *C. difficile*-related diarrhea | 90 | Penicillins | 664,123 | 23 | 45,763,864 | 0.01 | 1 [ref] | [ref] | [ref] | 1 [ref] | [ref] | [ref] |
|  | 90 | 3rd_cephalosporins | 48,004 | 5 | 3,203,819 | 0.02 | 8.11 | 2.37 | 27.7 | 3.39 | 0.96 | 11.92 |
|  | 90 | Quinolones | 23,907 | 3 | 1,651,165 | 0.02 | NA | NA | NA | NA | NA | NA |
|  | 90 | Tetracyclines | 1,658 | 0 | 112,021 | 0 | NA | NA | NA | NA | NA | NA |
|  | 90 | Lincosamides | 302 | 0 | 19,398 | 0 | NA | NA | NA | NA | NA | NA |
|  | 90 | 2nd_cephalosporins | 287,056 | 7 | 19,678,691 | 0 | 0.33 | 0.04 | 2.69 | 0.3 | 0.04 | 2.45 |
|  | 90 | 1st_cephalosporins | 16,949 | 2 | 1,178,883 | 0.02 | 11.19 | 2.32 | 53.87 | 8.56 | 1.46 | 50.01 |
|  | 90 | Macrolides | 189,381 | 8 | 13,067,966 | 0.01 | 1.99 | 0.58 | 6.79 | 1.74 | 0.51 | 5.98 |
|  | 90 | Sulfonamides | 5,413 | 0 | 378,433 | 0 | NA | NA | NA | NA | NA | NA |
| 11. Vaginitis | 30 | Penicillins | 315,019 | 5217 | 8,233,081 | 6.34 | 1 [ref] | [ref] | [ref] | 1 [ref] | [ref] | [ref] |
|  | 30 | 3rd_cephalosporins | 24,726 | 332 | 635,390 | 5.23 | 0.83 | 0.71 | 0.97 | 0.83 | 0.7 | 0.97 |
|  | 30 | Quinolones | 12,053 | 181 | 320,032 | 5.66 | 0.85 | 0.69 | 1.06 | 0.97 | 0.76 | 1.24 |
|  | 30 | Tetracyclines | 667 | 14 | 17,647 | 7.93 | 0.56 | 0.18 | 1.74 | 0.61 | 0.15 | 2.44 |
|  | 30 | Lincosamides | 135 | 4 | 3,435 | 11.64 | 1.63 | 0.41 | 6.54 | 2.14 | 0.31 | 14.92 |
|  | 30 | 2nd_cephalosporins | 145,223 | 2,193 | 3,821,903 | 5.74 | 0.94 | 0.87 | 1 | 0.93 | 0.87 | 1 |
|  | 30 | 1st_cephalosporins | 8,469 | 108 | 224,222 | 4.82 | 0.71 | 0.54 | 0.94 | 0.68 | 0.51 | 0.91 |
|  | 30 | Macrolides | 94,123 | 1,488 | 2,480,464 | 6 | 0.96 | 0.88 | 1.04 | 0.95 | 0.87 | 1.03 |
|  | 30 | Sulfonamides | 2,673 | 32 | 71,211 | 4.49 | 0.67 | 0.4 | 1.11 | 0.62 | 0.34 | 1.13 |
| 12. Aortic Aneurysm and dissection | 90 | Penicillins | 663,952 | 26 | 45,753,112 | 0.01 | 1 [ref] | [ref] | [ref] | 1 [ref] | [ref] | [ref] |
|  | 90 | 3rd_cephalosporins | 47,984 | 1 | 3,202,946 | 0 | NA | NA | NA | NA | NA | NA |
|  | 90 | Quinolones | 23,895 | 3 | 1,650,164 | 0.02 | NA | NA | NA | NA | NA | NA |
|  | 90 | Tetracyclines | 1,657 | 0 | 111,931 | 0 | NA | NA | NA | NA | NA | NA |
|  | 90 | Lincosamides | 302 | 0 | 19,398 | 0 | NA | NA | NA | NA | NA | NA |
|  | 90 | 2nd_cephalosporins | 286,970 | 13 | 19,673,498 | 0.01 | 2.07 | 0.8 | 5.36 | 1.85 | 0.71 | 4.79 |
|  | 90 | 1st_cephalosporins | 16,948 | 1 | 1,178,952 | 0.01 | 4.33 | 0.55 | 34.15 | 4.27 | 0.54 | 33.64 |
|  | 90 | Macrolides | 189,330 | 9 | 13,064,681 | 0.01 | 1.95 | 0.65 | 5.83 | 1.76 | 0.58 | 5.35 |
|  | 90 | Sulfonamides | 5,411 | 0 | 378,416 | 0 | NA | NA | NA | NA | NA | NA |
| 13. Arrhythmia | 90 | Penicillins | 663,863 | 95 | 45,744,058 | 0.02 | 1 [ref] | [ref] | [ref] | 1 [ref] | [ref] | [ref] |
|  | 90 | 3rd_cephalosporins | 47,982 | 12 | 3,202,721 | 0.04 | 2.28 | 1.08 | 4.8 | 1.74 | 0.79 | 3.83 |
|  | 90 | Quinolones | 23,893 | 6 | 1,649,974 | 0.04 | 1.11 | 0.27 | 4.56 | 0.78 | 0.16 | 3.86 |
|  | 90 | Tetracyclines | 1,657 | 0 | 111,931 | 0 | NA | NA | NA | NA | NA | NA |
|  | 90 | Lincosamides | 302 | 0 | 19,398 | 0 | NA | NA | NA | NA | NA | NA |
|  | 90 | 2nd_cephalosporins | 286,916 | 40 | 19,668,258 | 0.02 | 0.88 | 0.52 | 1.5 | 0.86 | 0.5 | 1.46 |
|  | 90 | 1st_cephalosporins | 16,944 | 0 | 1,178,732 | 0 | NA | NA | NA | NA | NA | NA |
|  | 90 | Macrolides | 189,314 | 21 | 13,062,947 | 0.02 | 0.98 | 0.54 | 1.77 | 0.98 | 0.54 | 1.79 |
|  | 90 | Sulfonamides | 5,411 | 1 | 378,193 | 0.03 | NA | NA | NA | NA | NA | NA |
| 14. Acute renal failure | 21 | Penicillins | 663,760 | 39 | 12,689,560 | 0.03 | 1 [ref] | [ref] | [ref] | 1 [ref] | [ref] | [ref] |
|  | 21 | 3rd_cephalosporins | 47,964 | 10 | 901,889 | 0.11 | 3.29 | 1.11 | 9.77 | 2.68 | 0.76 | 9.49 |
|  | 21 | Quinolones | 23,890 | 3 | 459,809 | 0.07 | 4.92 | 1.44 | 16.8 | 4.66 | 1.23 | 17.65 |
|  | 21 | Tetracyclines | 1,656 | 0 | 31,559 | 0 | NA | NA | NA | NA | NA | NA |
|  | 21 | Lincosamides | 301 | 0 | 5,512 | 0 | NA | NA | NA | NA | NA | NA |
|  | 21 | 2nd_cephalosporins | 286,846 | 29 | 5,485,875 | 0.05 | 2.03 | 1.02 | 4.07 | 1.88 | 0.94 | 3.78 |
|  | 21 | 1st_cephalosporins | 16,937 | 0 | 325,338 | 0 | NA | NA | NA | NA | NA | NA |
|  | 21 | Macrolides | 189,286 | 14 | 3,636,287 | 0.04 | 1.86 | 0.83 | 4.16 | 1.82 | 0.81 | 4.09 |
|  | 21 | Sulfonamides | 5,407 | 0 | 1,047,94 | 0 | NA | NA | NA | NA | NA | NA |
| 15. Muscular and skeletal reaction | 90 | Penicillins | 636,843 | 7,631 | 43,696,379 | 1.75 | 1 [ref] | [ref] | [ref] | 1 [ref] | [ref] | [ref] |
|  | 90 | 3rd_cephalosporins | 45,678 | 622 | 3,035,372 | 2.05 | 1.14 | 1.01 | 1.28 | 0.97 | 0.85 | 1.09 |
|  | 90 | Quinolones | 22,657 | 371 | 1,557,913 | 2.38 | 1.41 | 1.22 | 1.63 | 1.2 | 1.01 | 1.42 |
|  | 90 | Tetracyclines | 1,570 | 27 | 105,508 | 2.56 | 0.98 | 0.51 | 1.88 | 0.86 | 0.38 | 1.96 |
|  | 90 | Lincosamides | 285 | 4 | 18,138 | 2.21 | 1.36 | 0.34 | 5.45 | 1.61 | 0.4 | 6.52 |
|  | 90 | 2nd_cephalosporins | 274,658 | 3,509 | 18,742,763 | 1.87 | 1.06 | 1 | 1.12 | 1.02 | 0.97 | 1.08 |
|  | 90 | 1st_cephalosporins | 16,187 | 202 | 1,119,732 | 1.8 | 1.05 | 0.86 | 1.27 | 1.01 | 0.82 | 1.24 |
|  | 90 | Macrolides | 181,249 | 2,366 | 12,444,321 | 1.9 | 1.05 | 0.99 | 1.13 | 1.01 | 0.94 | 1.08 |
|  | 90 | Sulfonamides | 5,154 | 69 | 358,368 | 1.93 | 1.12 | 0.8 | 1.56 | 1.06 | 0.74 | 1.54 |
| 16. Neuropathy | 90 | Penicillins | 658,048 | 1,095 | 45,342,307 | 0.24 | 1 [ref] | [ref] | [ref] | 1 [ref] | [ref] | [ref] |
|  | 90 | 3rd_cephalosporins | 47,204 | 127 | 3,149,572 | 0.4 | 1.55 | 1.19 | 2.02 | 1.11 | 0.84 | 1.48 |
|  | 90 | Quinolones | 23,478 | 77 | 1,620,162 | 0.48 | 2.3 | 1.71 | 3.1 | 1.53 | 1.07 | 2.18 |
|  | 90 | Tetracyclines | 1,636 | 5 | 110,734 | 0.45 | 2.2 | 0.71 | 6.85 | 2.27 | 0.57 | 9.11 |
|  | 90 | Lincosamides | 300 | 1 | 19,210 | 0.52 | 4.43 | 0.62 | 31.53 | 2.73 | 0.38 | 19.52 |
|  | 90 | 2nd_cephalosporins | 284,110 | 533 | 19,475,855 | 0.27 | 1.08 | 0.93 | 1.25 | 1 | 0.86 | 1.16 |
|  | 90 | 1st_cephalosporins | 16,722 | 45 | 1,162,982 | 0.39 | 1.43 | 0.92 | 2.2 | 1.18 | 0.74 | 1.89 |
|  | 90 | Macrolides | 187,620 | 337 | 12,946,008 | 0.26 | 0.99 | 0.83 | 1.18 | 0.96 | 0.8 | 1.14 |
|  | 90 | Sulfonamides | 5,337 | 8 | 373,237 | 0.21 | 0.85 | 0.32 | 2.26 | 1.02 | 0.36 | 2.89 |

Supplementary Figure 1. Covariate balance using absolute standardized mean differences before and after inverse probability of treatment weighting for each cohort


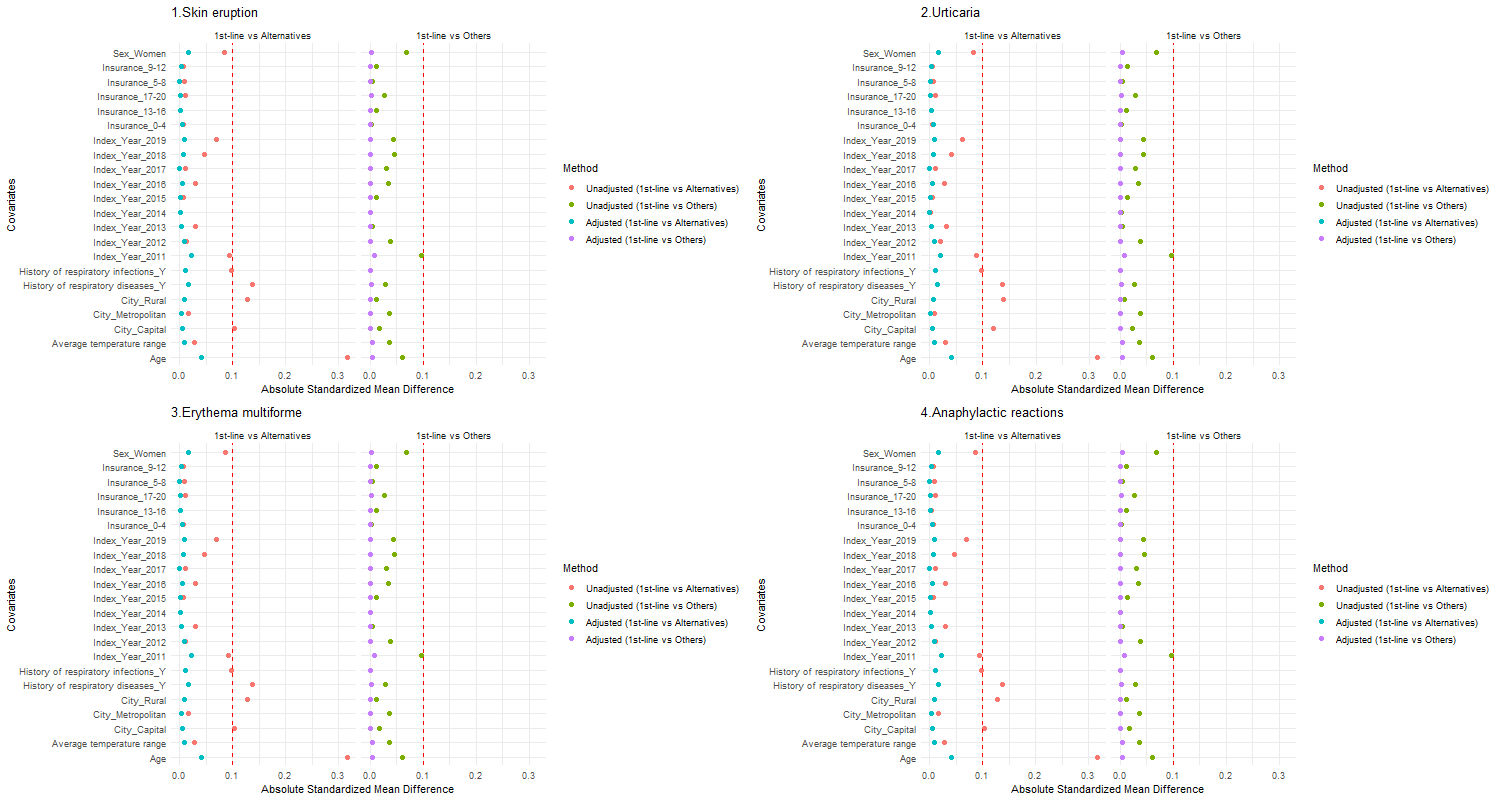


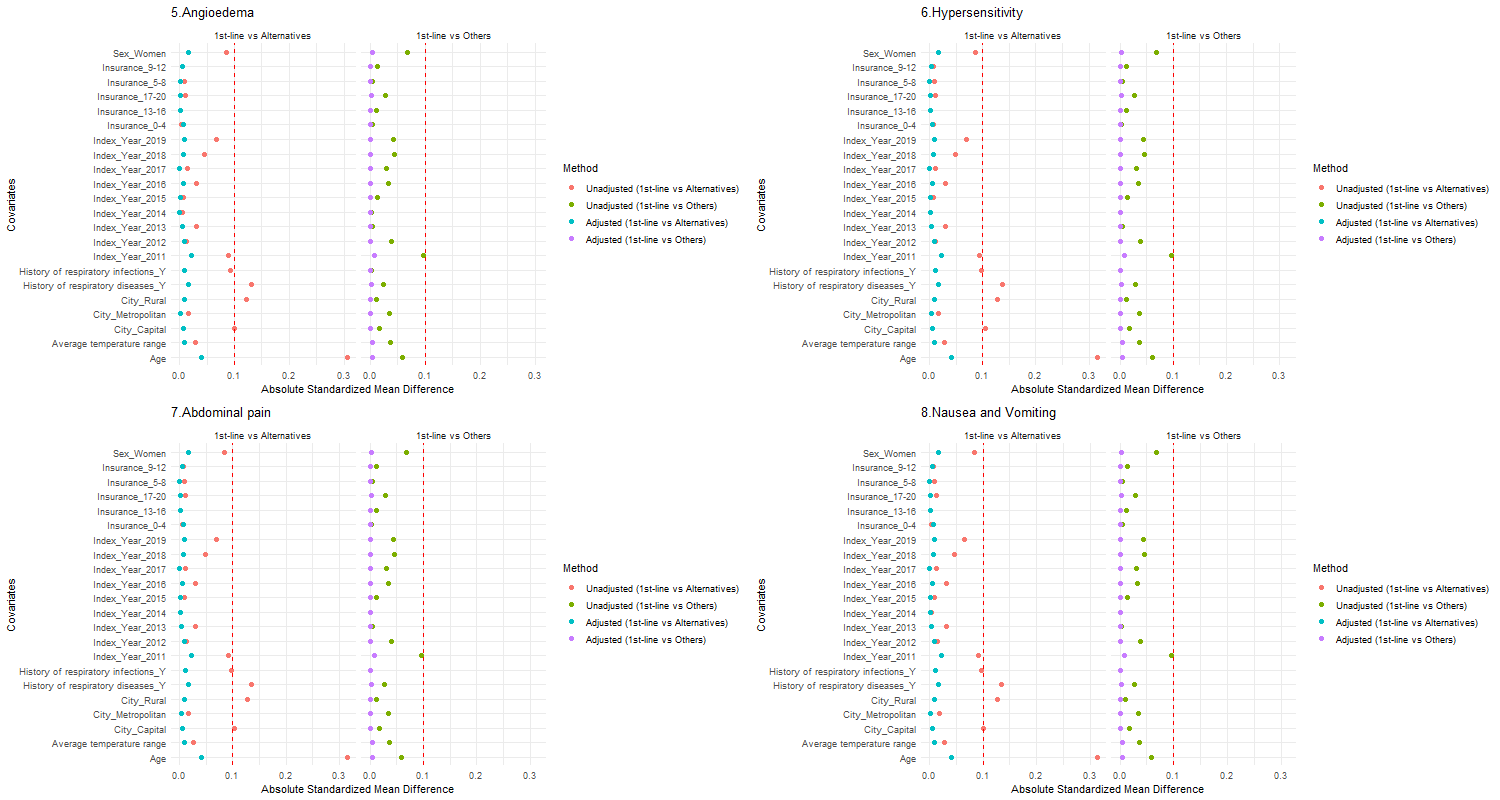


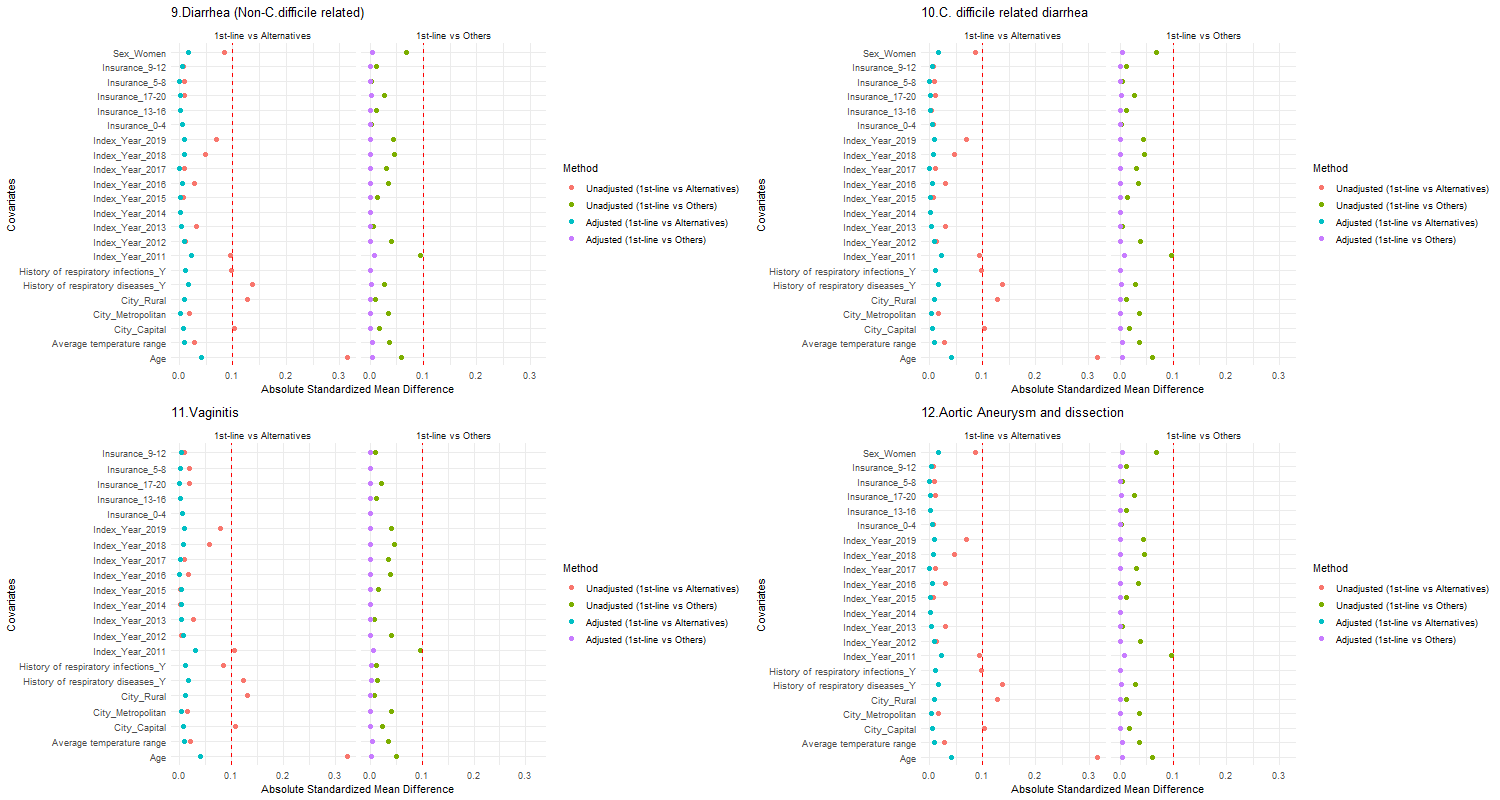


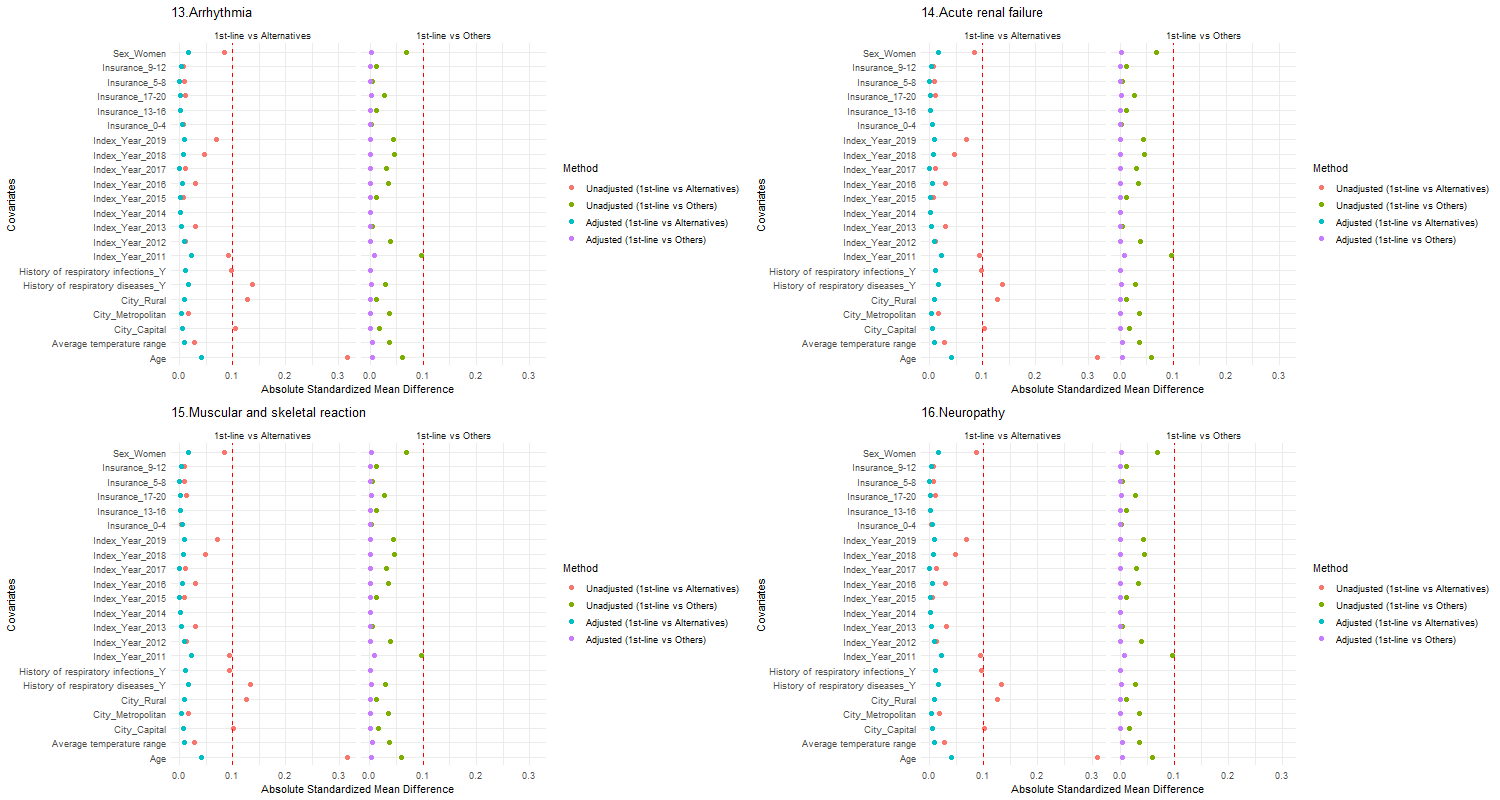


Supplementary Figure 2. Cloning-censoring-weighting by treatment group using stabilized IPCW


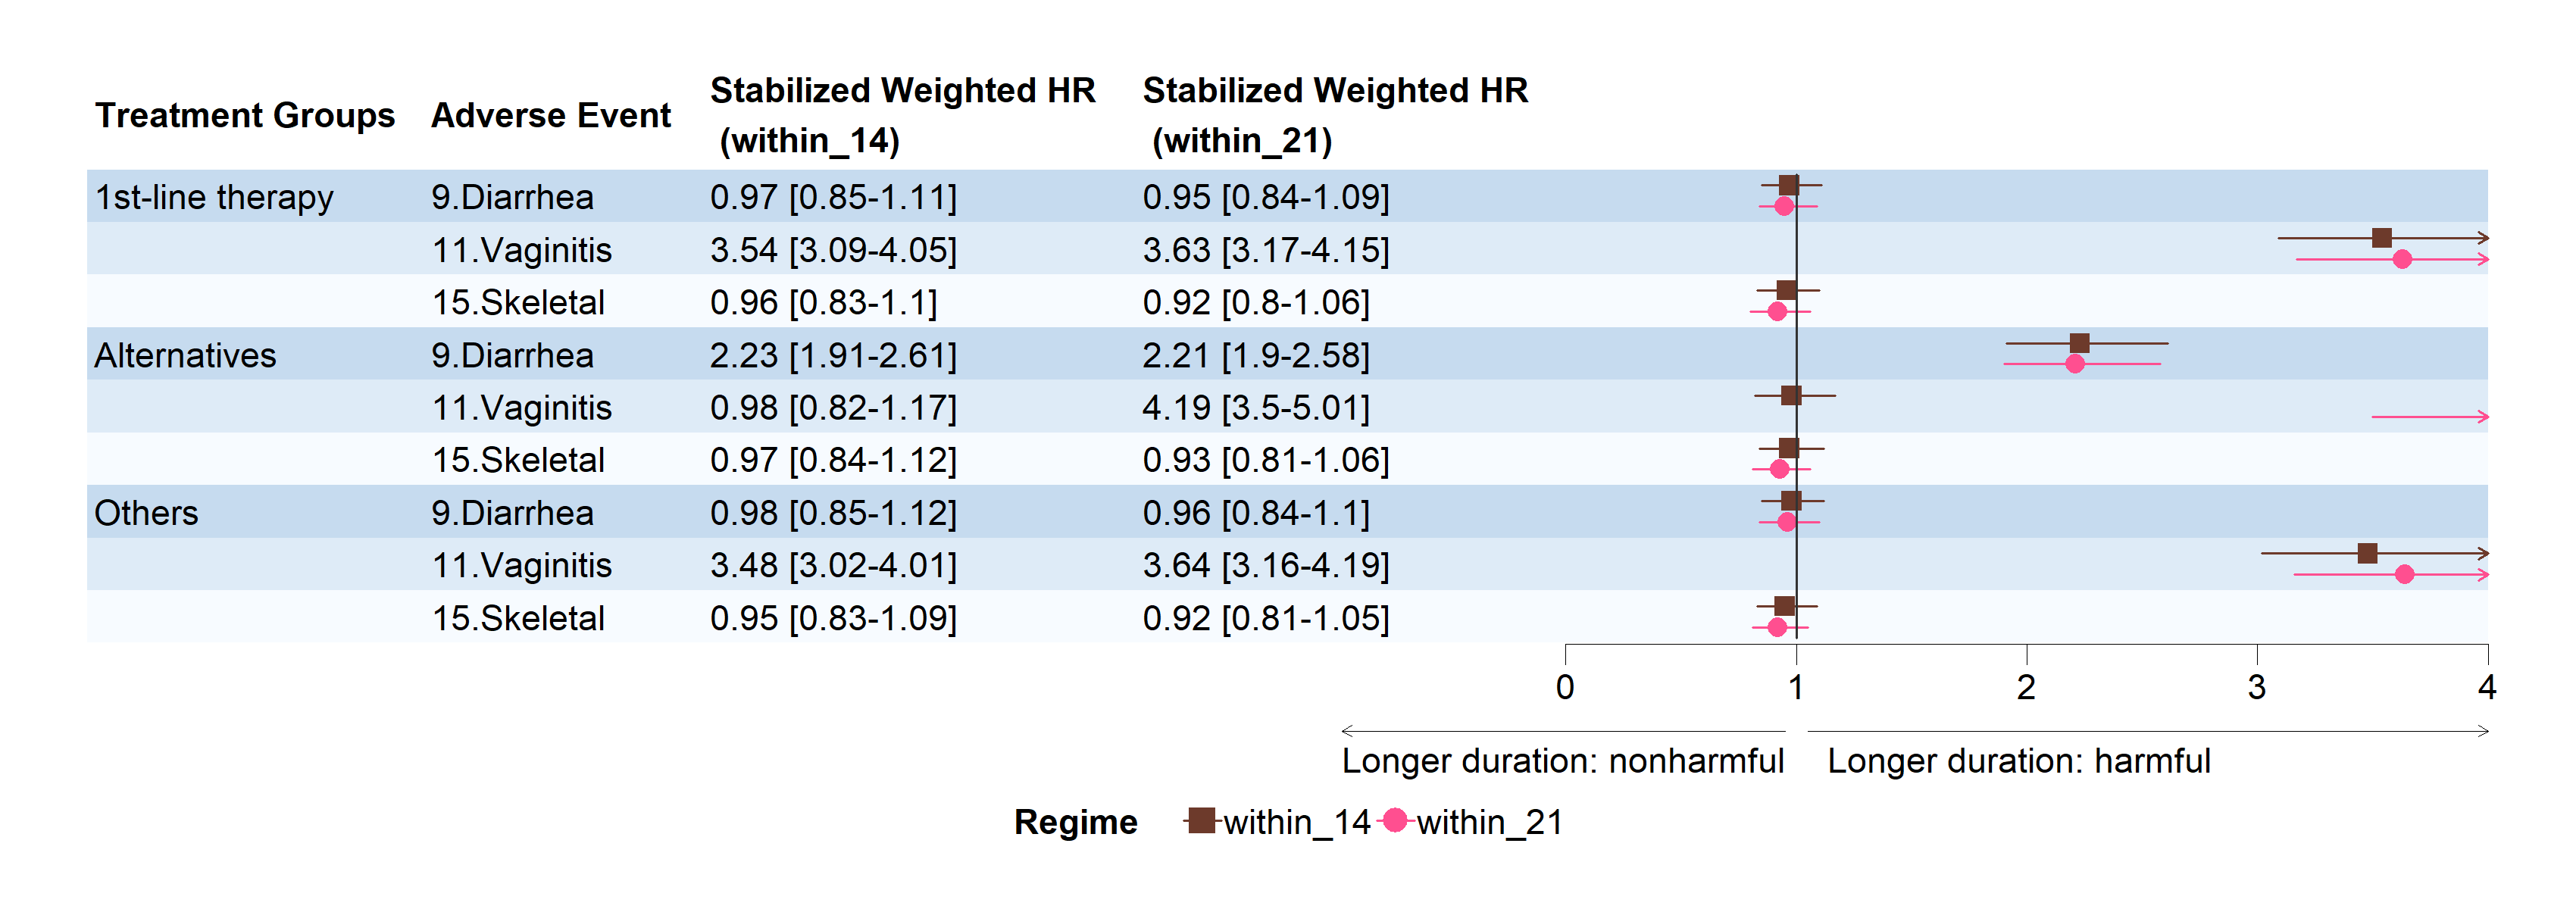


Supplementary Figure 3. Cloning-censoring-weighting by antibiotic class using stabilized IPCW


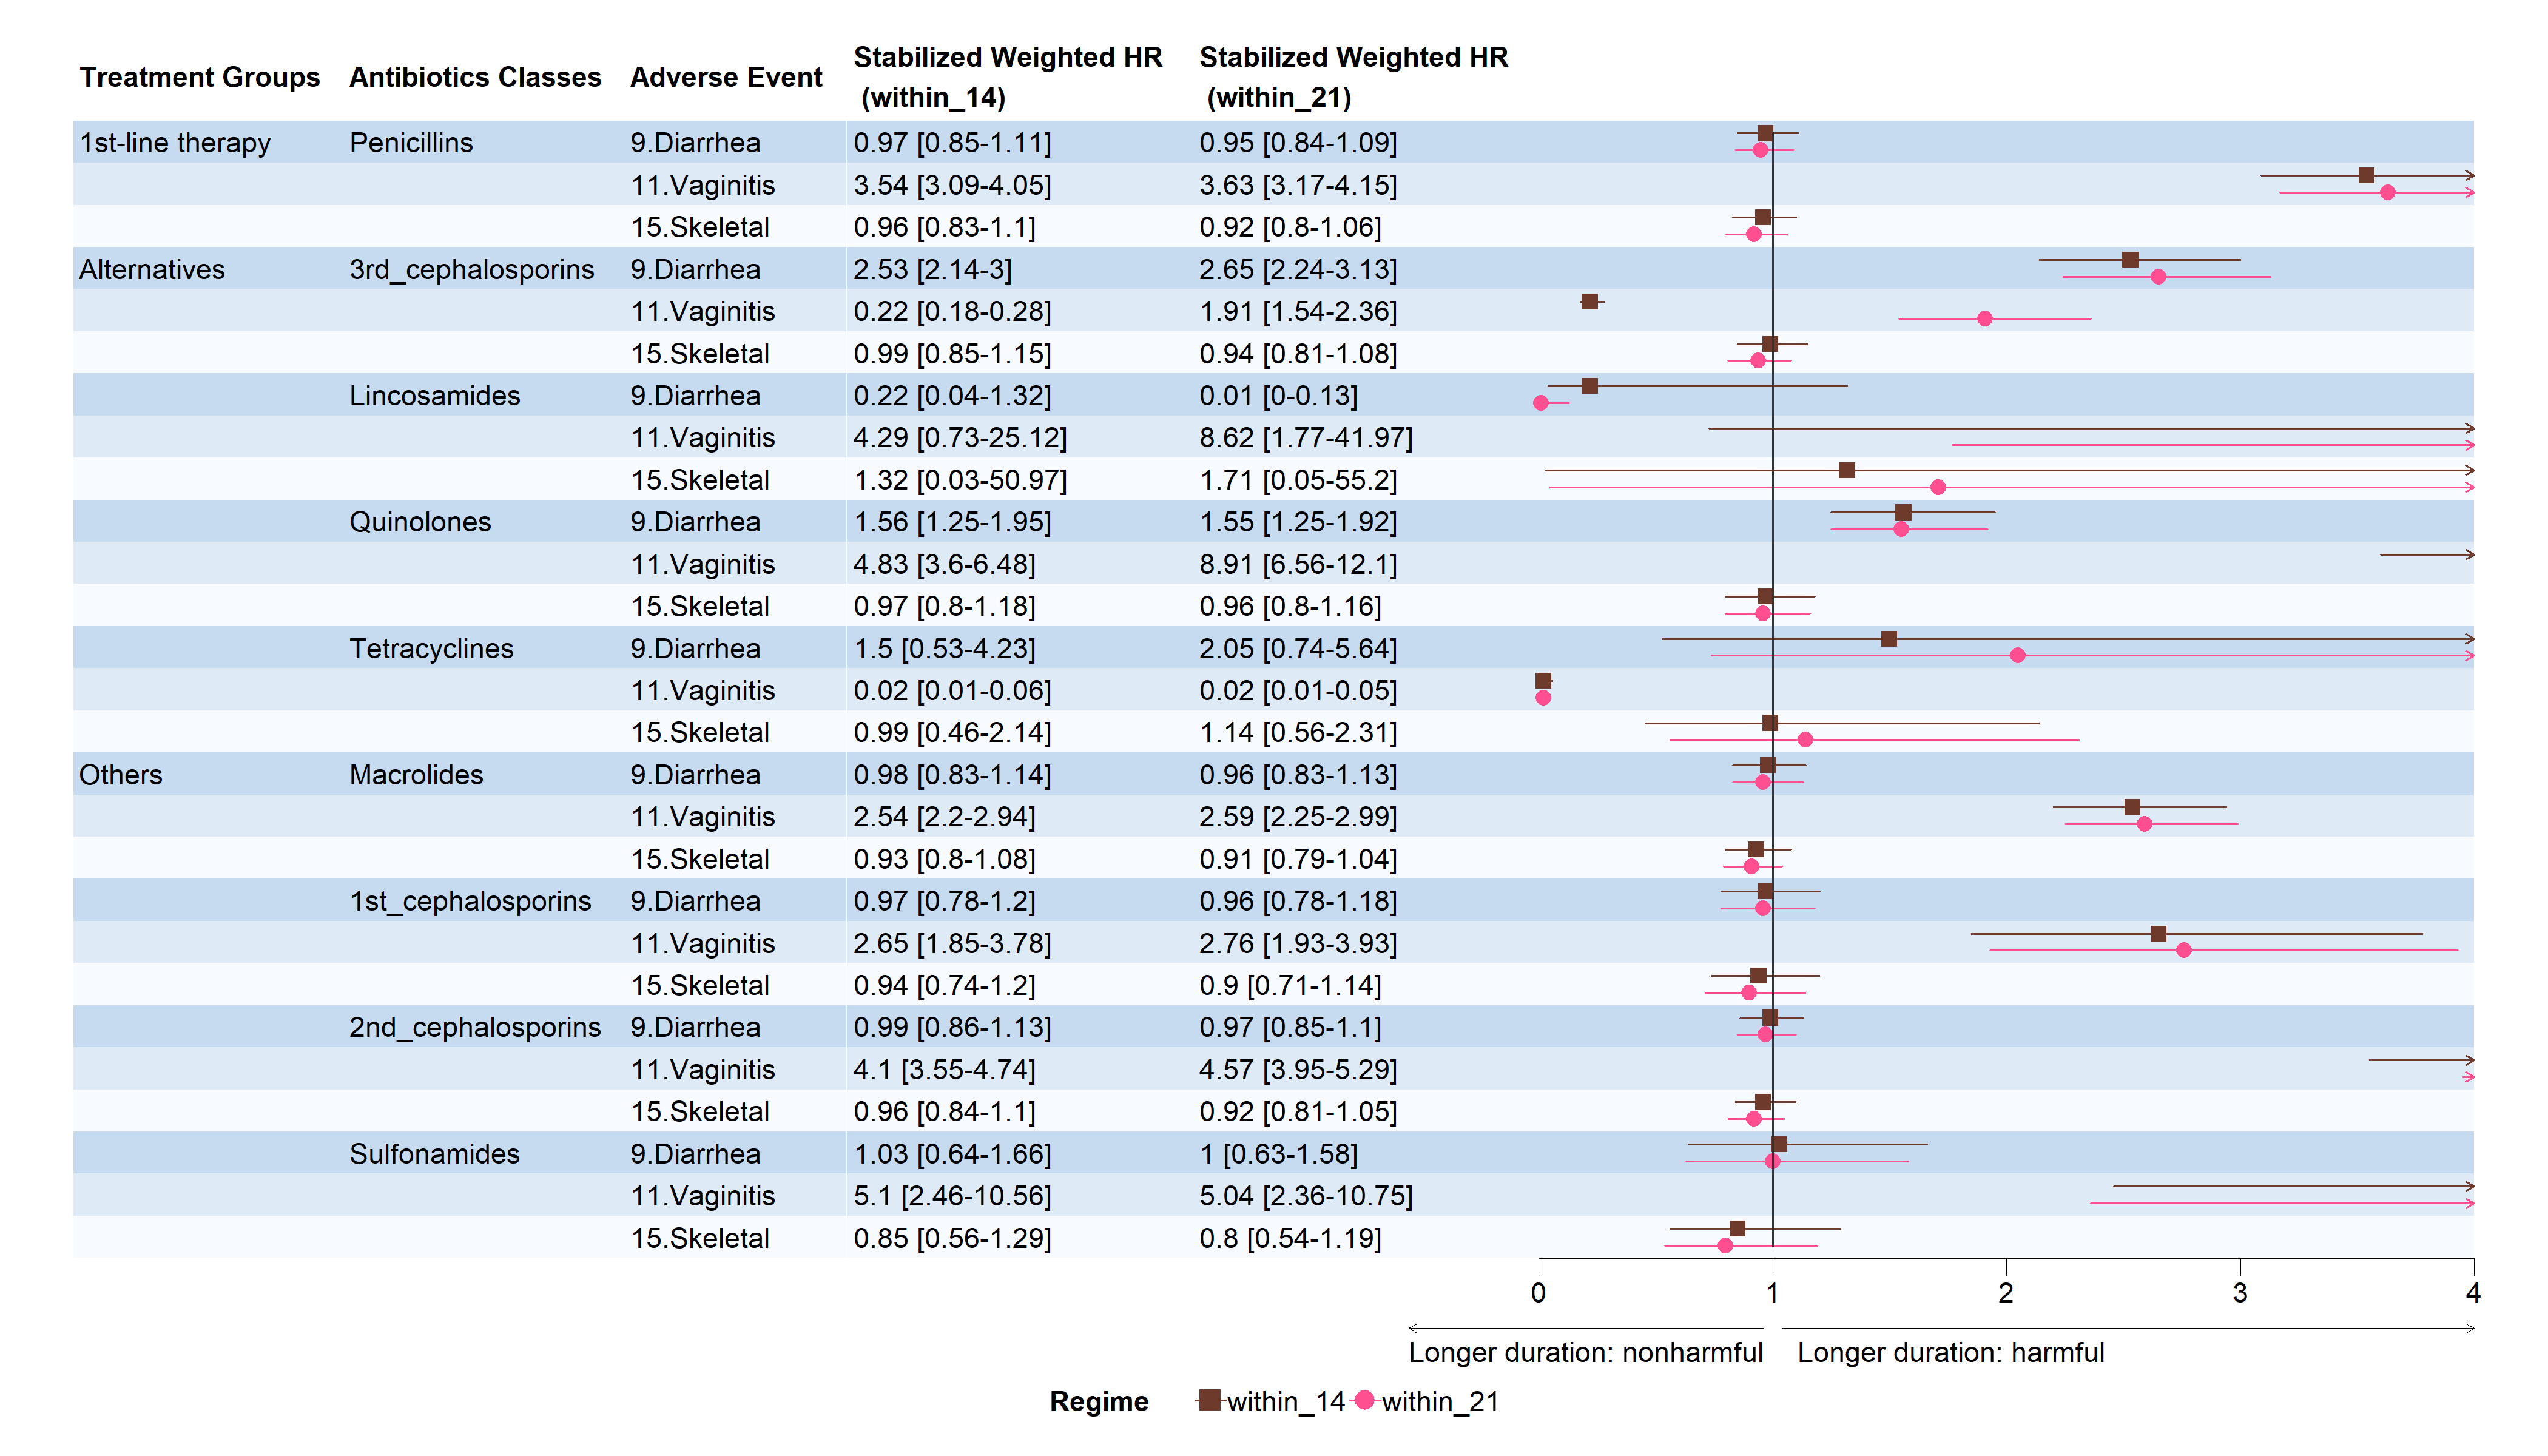


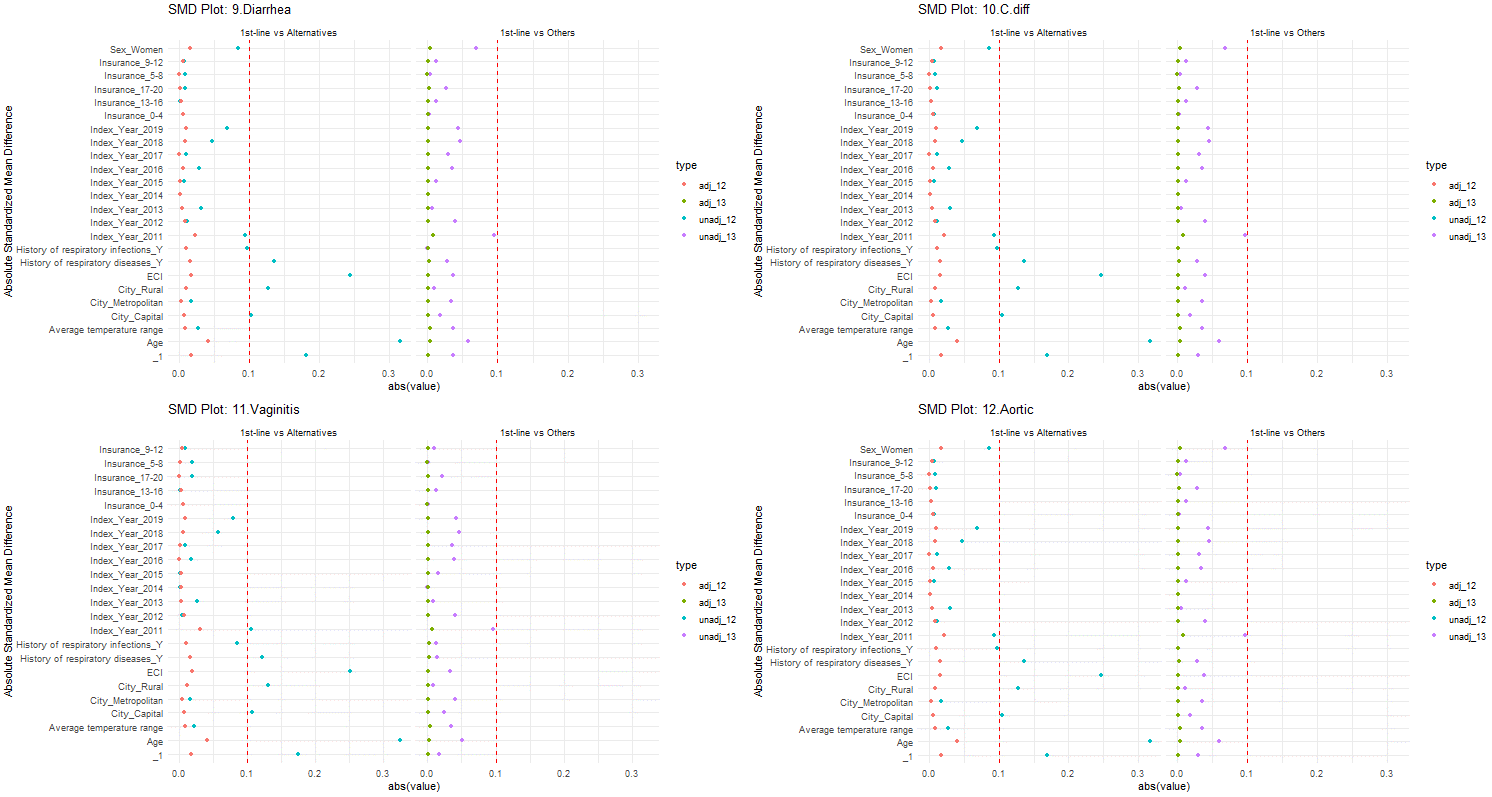

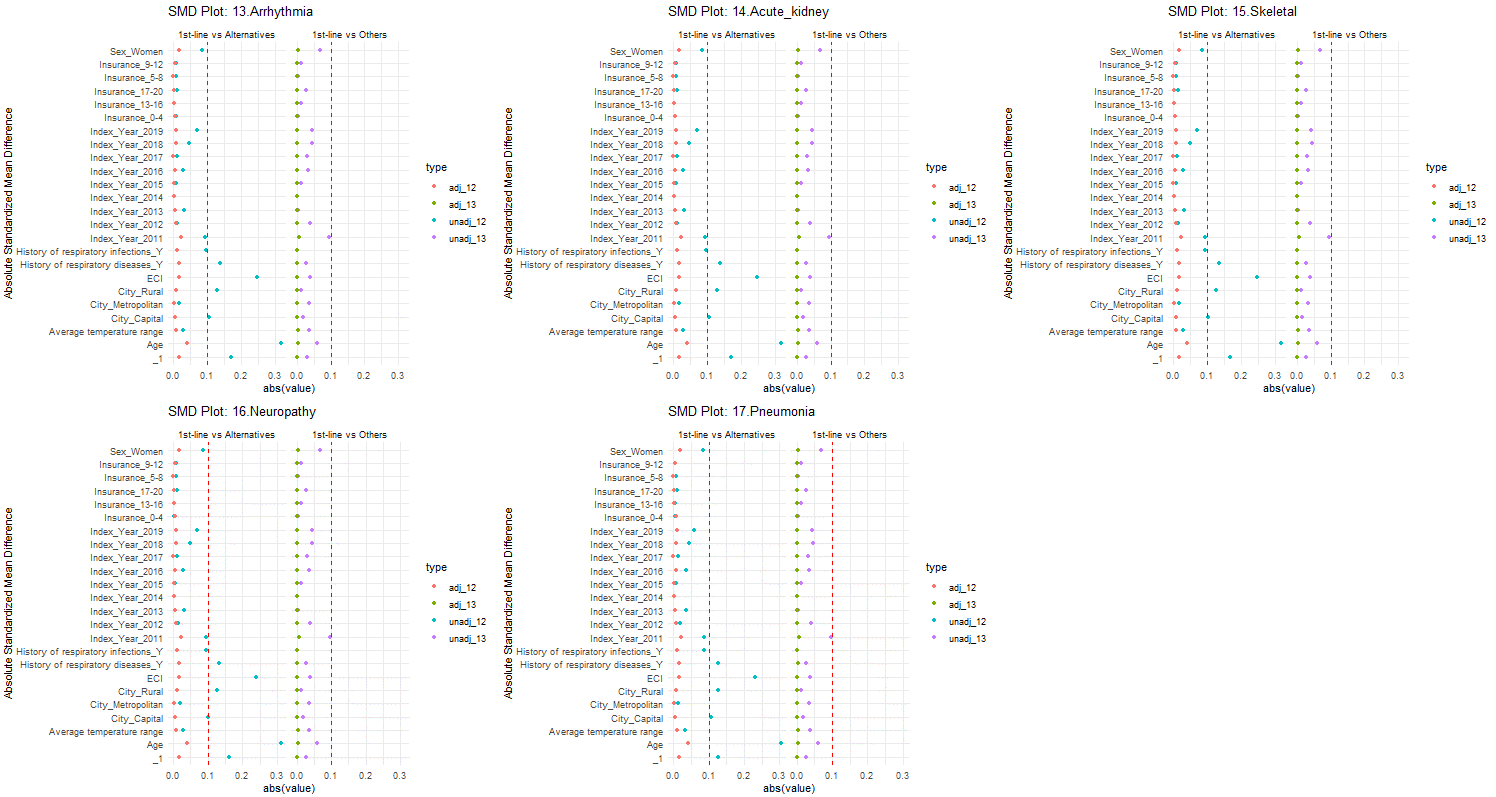

Supplement: Supplementary file 1 [file 2869253c5bbf32f378564fa3.docx]
